# Supplementary material for: Improving the Cd2+ detection capability of a new anionic rare earth metal–organic framework based on a [RE6(μ3-OH)8]10+ secondary building unit: an ion-exchange approach towards more efficient sensors
Source: Royal Society of Chemistry journal article supplement (doi:10.1039/c9me00176j), 2020-01-01
Supplement: c9me00176j1.pdf [file c9me00176j1.pdf]

## Electronic Supplementary Information (ESI)

### **Improving the Cd<sup>2+</sup> sensing capability of a new anionic Rare Earth Metal-Organic Framework based on a [RE<sub>6</sub>(μ<sub>3</sub>-OH)<sub>8</sub>]<sup>10+</sup> secondary building unit: An ion - exchange approach towards more efficient sensors**

Nikos Panagiotou<sup>a</sup>, Kasiani Evangelou<sup>a</sup>, Athanasia Psalti<sup>b</sup>, Nektaria Varnava<sup>a</sup>, Giasemi K. Angeli<sup>c</sup>, Pantelis N. Trikalitis<sup>c</sup>, John C. Plakatouras<sup>ad</sup>, Theodore Lazarides<sup>b\*</sup>, Anastasios J. Tasiopoulos<sup>a\*</sup>

<sup>a</sup>Department of Chemistry, University of Cyprus, 1678 Nicosia, Cyprus. E-mail: atasio@ucy.ac.cy

<sup>b</sup>Laboratory of Inorganic Chemistry, Department of Chemistry, Aristotle University of Thessaloniki, 54124 Thessaloniki, Greece. E-mail: tlazarides@chem.auth.gr

<sup>c</sup>Department of Chemistry, University of Crete, Voutes 71003, Heraklion, Greece.

<sup>d</sup>On sabbatical leave from Department of Chemistry, University of Ioannina, 45110 Ioannina, Greece.

# Table of Contents

|                                                                                                                         |    |
|-------------------------------------------------------------------------------------------------------------------------|----|
| Experimental Section.....                                                                                               | 3  |
| Physical Measurements/Characterization .....                                                                            | 6  |
| Topological Analysis .....                                                                                              | 8  |
| Stability Studies.....                                                                                                  | 9  |
| Characterization of Na <sup>+</sup> - and Mg <sup>2+</sup> - exchanged analogues .....                                  | 12 |
| Gas Sorption Measurements .....                                                                                         | 17 |
| Photoluminescence Studies .....                                                                                         | 20 |
| Cadmium/Mercury Sensing Studies .....                                                                                   | 23 |
| Regeneration of Na <sub>2</sub> @(1)(Y).....                                                                            | 29 |
| Cadmium Sorption Measurements .....                                                                                     | 30 |
| Proposed structure of Cd <sup>2+</sup> @(1)(Y) and Mg <sup>2+</sup> @(1)(Y) based on powder X-ray diffraction data..... | 32 |
| References .....                                                                                                        | 37 |

## Experimental Section

**Photoluminescence Measurements and Cadmium Sensing Studies.** Steady state emission and excitation spectra and the decay profiles for  $((\text{CH}_3)_2\text{NH}_2)^+_2(\mathbf{1})(\text{Y}_{0.95}\text{Eu}_{0.05})$  and  $((\text{CH}_3)_2\text{NH}_2)^+_2(\mathbf{1})(\text{Y}_{0.95}\text{Tb}_{0.05})$  were measured using an Edinburgh Xe900 spectrofluorometer. Solid state excitation spectra (excitation and emission slit = 2.5nm) were measured by monitoring the emission intensity at 404nm (for  $\text{H}_2\text{OBA}$ ,  $((\text{CH}_3)_2\text{NH}_2)^+_2(\mathbf{1})(\text{Y})$  and the  $\text{Na}^+$  - and  $\text{Mg}^{2+}$  - exchanged analogues), at 614nm (for  $((\text{CH}_3)_2\text{NH}_2)^+_2(\mathbf{1})(\text{Y}_{0.95}\text{Eu}_{0.05})$  and at 543nm (for  $((\text{CH}_3)_2\text{NH}_2)^+_2(\mathbf{1})(\text{Y}_{0.95}\text{Tb}_{0.05})$  and emission spectra (excitation and emission slit = 2.5nm) were recorded with an excitation wavelength of 311nm and 351nm (for  $((\text{CH}_3)_2\text{NH}_2)^+_2(\mathbf{1})(\text{Y})$  and the  $\text{Na}^+$  - and  $\text{Mg}^{2+}$  - exchanged analogues) and 311 nm for  $((\text{CH}_3)_2\text{NH}_2)^+_2(\mathbf{1})(\text{Y}_{0.95}\text{Eu}_{0.05})$  and  $((\text{CH}_3)_2\text{NH}_2)^+_2(\mathbf{1})(\text{Y}_{0.95}\text{Tb}_{0.05})$ .

Fluorescence titration studies for both the  $((\text{CH}_3)_2\text{NH}_2)^+_2(\mathbf{1})(\text{Y}_{0.95}\text{Eu}_{0.05})$  and the  $\text{Na}_2(\mathbf{1})(\text{Y}_{0.95}\text{Eu}_{0.05})$  materials was conducted after suspension of the corresponding crystals in DMF. More precisely, 1 mg of crystals was transferred in a vial containing 10 ml DMF and a fine suspension formed after sonication of the mixture for 1 h. Fluorescence titrations were conducted by adding an aqueous solution of  $\text{Cd}^{2+}$  ions (solution of  $\text{CdCl}_2$   $10^{-2}$  M) in the sample to be measured, by increments of 5  $\mu\text{l}$ , 10  $\mu\text{l}$  and 20  $\mu\text{l}$ , successively. Regeneration experiments were performed by addition to a fine suspension of  $\text{Na}_2(\mathbf{1})(\text{Y}_{0.95}\text{Eu}_{0.05})$  in DMF (0.1 mg/ mL) formed after sonication of the mixture for 1 h, an aqueous solution of  $\text{CdCl}_2$  ( $10^{-2}$  M) by increments of 5  $\mu\text{l}$ , 10  $\mu\text{l}$  and 20  $\mu\text{l}$ , successively followed by addition of aliquots of saturated aqueous solution of  $\text{NaCl}$ . After each addition the luminescence spectra were recorded with  $\lambda_{\text{ex}} = 283\text{nm}$ .

**Single crystal X-ray crystallography.** Single Crystal X-ray diffraction data were collected on a Rigaku Supernova A diffractometer, equipped with a CCD area detector utilizing  $\text{Cu-K}\alpha$  ( $\lambda = 1.5418 \text{ \AA}$ ) radiation. A suitable crystal was mounted on a Hampton cryoloop with Paratone-N oil and transferred to a goniostat where it was cooled for data collection. The structures were solved by direct methods using SHELXT and refined on  $F^2$  using full-matrix least squares using SHELXL14.1.<sup>1</sup> Software packages used: CrysAlis CCD for data collection, CrysAlis RED for cell refinement and data reduction<sup>2</sup>, WINGX for geometric calculations<sup>3</sup>, and DIAMOND for molecular graphics<sup>4</sup>. The non-H atoms were treated anisotropically, whereas the aromatic

hydrogen atoms were placed in calculated, ideal positions and refined as riding on their respective carbon atoms. Electron density contributions from disordered guest molecules and dimethyl ammonium ions were handled using the SQUEEZE procedure from the PLATON software suit<sup>5</sup> due to the disordered nature of these ions. Selected crystal data for ((CH<sub>3</sub>)<sub>2</sub>NH<sub>2</sub>)<sub>2</sub><sup>+</sup>(1)(Y) and ((CH<sub>3</sub>)<sub>2</sub>NH<sub>2</sub>)<sub>2</sub><sup>+</sup>(1)(Ho) are summarized in Table S1. CCDC 1971376 (((CH<sub>3</sub>)<sub>2</sub>NH<sub>2</sub>)<sub>2</sub><sup>+</sup>(1)(Y) and 1971377 ((CH<sub>3</sub>)<sub>2</sub>NH<sub>2</sub>)<sub>2</sub><sup>+</sup>(1)(Ho) contains the supplementary crystallographic data for this paper. Full details can be found in the CIF files provided as Supplementary Information.

**Table S1.** Selected Crystal Data for ((CH<sub>3</sub>)<sub>2</sub>NH<sub>2</sub>)<sub>2</sub><sup>+</sup>(1)(Y) and ((CH<sub>3</sub>)<sub>2</sub>NH<sub>2</sub>)<sub>2</sub><sup>+</sup>(1)(Ho).

|                                      |                                                                                                       |                                                                                                       |
|--------------------------------------|-------------------------------------------------------------------------------------------------------|-------------------------------------------------------------------------------------------------------|
| Empirical formula                    | C <sub>42</sub> H <sub>24</sub> O <sub>19</sub> Y <sub>3</sub>                                        | C <sub>48</sub> H <sub>48</sub> N <sub>3</sub> O <sub>22</sub> Ho <sub>3</sub>                        |
| Formula weight                       | 1099.34                                                                                               | 1513.68                                                                                               |
| Temperature                          | 104.8(6) K                                                                                            | 109(7) K                                                                                              |
| Wavelength                           | 1.54184 Å                                                                                             | 1.54184 Å                                                                                             |
| Crystal system                       | Trigonal                                                                                              | Trigonal                                                                                              |
| Space group                          | R $\bar{3}$                                                                                           | R $\bar{3}$                                                                                           |
| Unit cell dimensions                 | a = 27.755(2) Å, $\alpha$ = 90°<br>b = 27.755(2) Å, $\beta$ = 90°<br>c = 24.566(4) Å, $\gamma$ = 120° | a = 27.765(1) Å, $\alpha$ = 90°<br>b = 27.765(1) Å, $\beta$ = 90°<br>c = 24.633(1) Å, $\gamma$ = 120° |
| Volume                               | 16389(3) Å <sup>3</sup>                                                                               | 16445.2(16) Å <sup>3</sup>                                                                            |
| Z                                    | 6                                                                                                     | 6                                                                                                     |
| Density (calculated)                 | 0.668 g/cm <sup>3</sup>                                                                               | 0.917 g/cm <sup>3</sup>                                                                               |
| Absorption coefficient               | 2.360 mm <sup>-1</sup>                                                                                | 4.220 mm <sup>-1</sup>                                                                                |
| F(000)                               | 3270                                                                                                  | 4404                                                                                                  |
| Crystal size                         | 0.061 x 0.054 x 0.018 mm <sup>3</sup>                                                                 | 0.046 x 0.044 x 0.026 mm <sup>3</sup>                                                                 |
| $\theta$ range for data collection   | 4.042 to 66.995°                                                                                      | 4.033 to 67.000°                                                                                      |
| Index ranges                         | -30 ≤ h ≤ 25, -22 ≤ k ≤ 33, -29 ≤ l ≤ 29                                                              | -33 ≤ h ≤ 33, -25 ≤ k ≤ 33, -29 ≤ l ≤ 26                                                              |
| Reflections collected                | 11775                                                                                                 | 30299                                                                                                 |
| Independent reflections              | 6482 [R <sub>int</sub> = 0.0327]                                                                      | 6540 [R <sub>int</sub> = 0.0412]                                                                      |
| Completeness to $\theta$ = 66.995°   | 99.5%                                                                                                 | 99.9%                                                                                                 |
| Refinement method                    | Full-matrix least-squares on F <sup>2</sup>                                                           | Full-matrix least-squares on F <sup>2</sup>                                                           |
| Data / restraints / parameters       | 6482 / 0 / 193                                                                                        | 6540 / 0 / 222                                                                                        |
| Goodness-of-fit                      | 1.030                                                                                                 | 1.061                                                                                                 |
| Final R indices [I > 2 $\sigma$ (I)] | R <sub>obs</sub> = 0.0880, wR <sub>obs</sub> = 0.2608                                                 | R <sub>obs</sub> = 0.0602, wR <sub>obs</sub> = 0.1838                                                 |
| R indices [all data]                 | R <sub>all</sub> = 0.1076, wR <sub>all</sub> = 0.2739                                                 | R <sub>all</sub> = 0.0741, wR <sub>all</sub> = 0.1934                                                 |
| Largest diff. peak and hole          | 1.654 and -1.122 e <sup>-</sup> Å <sup>-3</sup>                                                       | 1.450 and -0.883 e <sup>-</sup> Å <sup>-3</sup>                                                       |

$^aR = \Sigma||F_o|-|F_c|| / \Sigma|F_o|$ ,  $wR = \{\Sigma[w(|F_o|^2 - |F_c|^2)^2] / \Sigma[w(|F_o|^4)]\}^{1/2}$  and  $^b_w = 1/[\sigma^2(F_o^2) + (mP)^2 + nP]$  where  $P = (F_o^2 + 2F_c^2)/3$  and m and n are constants.

**Gas sorption measurements.** Low Pressure gas sorption measurements were carried out at different temperatures using an Autosorb-iQ2 by Quantachrome equipped with a cryocooler system capable of temperature control from 20 to 320K. Prior to analysis the as made samples were washed with N,N- dimethylformamide four times per day for 1 day and then soaked in dichloromethane (DCM) 5 times per day for 5 days. Finally, the DCM exchanged samples were activated using supercritical CO<sub>2</sub>, weighted accurately and transferred to the analysis port of the gas sorption instrument.

**Cadmium sorption measurements.** Cadmium sorption experiments were performed at room temperature ( $296 \pm 2K$ ) under normal atmospheric conditions in DMF/H<sub>2</sub>O (7:3) solutions. The preparation of the test solutions involved dilution of an appropriate amount of a Cd<sup>2+</sup> stock solution (0.1 M) that was prepared by dissolution of CdCl<sub>2</sub>·6H<sub>2</sub>O in distilled water. Generally, test solutions (30 ml) containing Cd<sup>2+</sup> of known concentration, were mixed with a given mass of MOF and the resulting suspension was shaken in a thermostated orbital shaker (at 100 rpm) for 2 h to assure that equilibrium had been reached. For studying the effect of initial Cd<sup>2+</sup> concentration, the latter was varied between 10<sup>-5</sup> and 9\*10<sup>-3</sup> M in the test suspensions (0.033g of MOF in 30 ml solution). For kinetic studies certain amount of MOF (0.033 g) was mixed with 100 ml of Cd<sup>2+</sup> solution ( $[Cd^{2+}] = 1*10^{-3}$  M, T = 296 K for ((CH<sub>3</sub>)<sub>2</sub>NH<sub>2</sub>)<sub>2</sub><sup>+</sup>(1)(Y) and the metal concentration was determined at regular time steps. For the Cd<sup>2+</sup> analysis, aliquots collected from the suspension were filtered with membrane filters (pore size: 0.22 μm) and the Cd<sup>2+</sup> concentration was determined with ICP-OES.

## Physical Measurements/Characterization

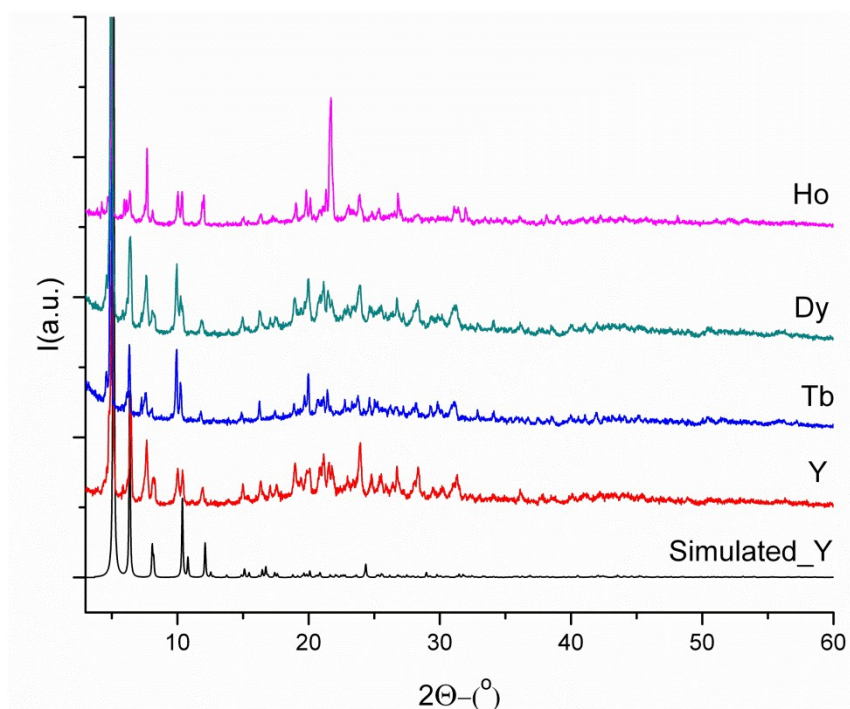

**Figure S1.** Powder X-ray diffraction pattern of the as synthesized compounds  $((\text{CH}_3)_2\text{NH}_2)^+_2(\mathbf{1})(\text{RE})$ , along with the simulated pattern of  $((\text{CH}_3)_2\text{NH}_2)^+_2(\mathbf{1})(\text{Y})$  from the single crystal data.

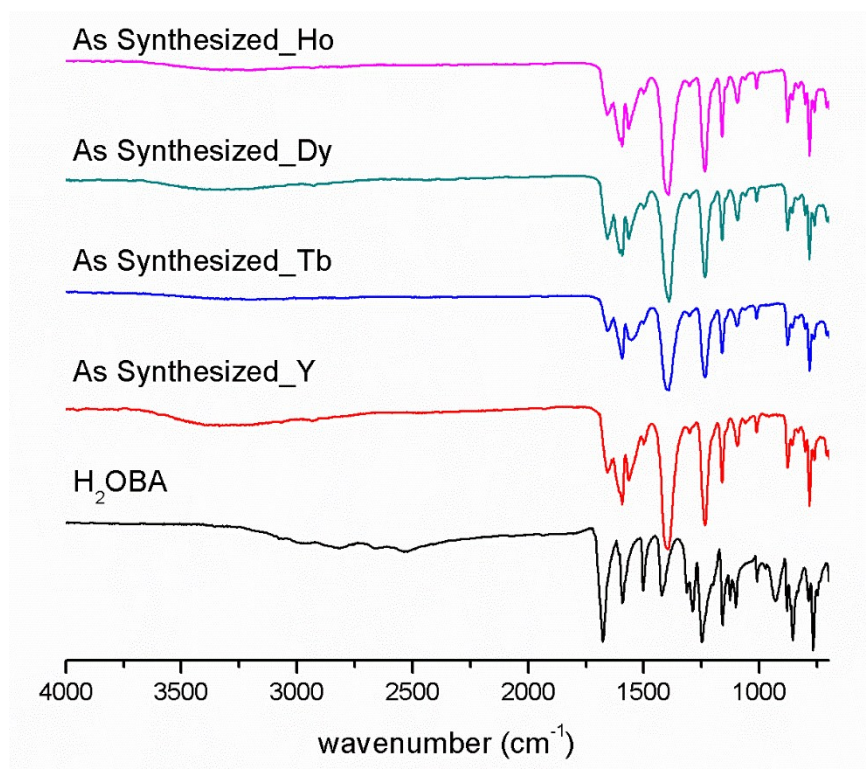

**Figure S2.** IR spectra of H<sub>2</sub>OBA and the as synthesized compounds  $((\text{CH}_3)_2\text{NH}_2)^+_2(\mathbf{1})(\text{RE})$ .

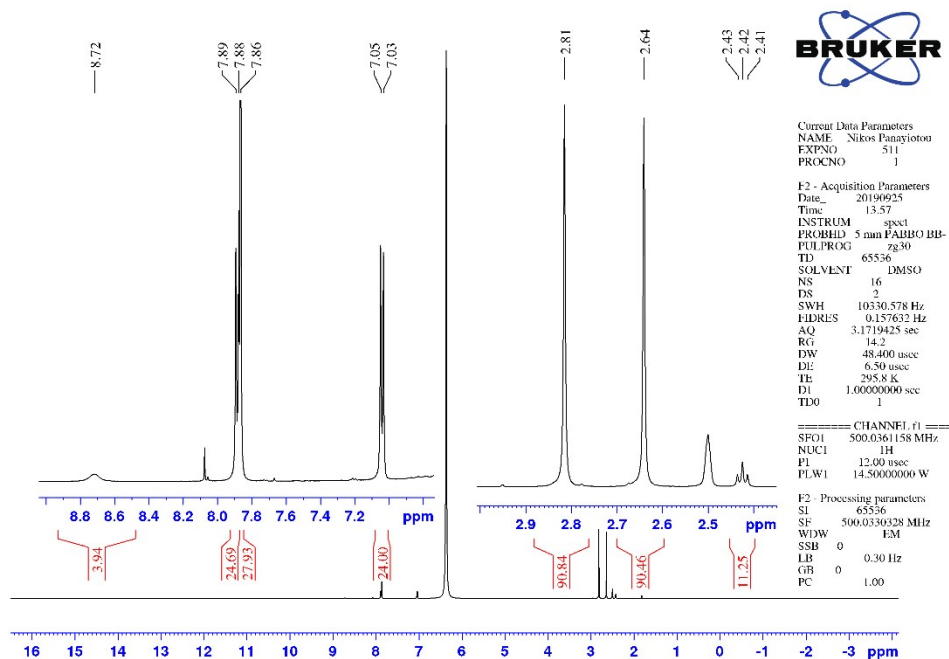

**Figure S3.**  $^1\text{H}$ -NMR spectrum of as synthesized  $((\text{CH}_3)_2\text{NH}_2)^+_2(\mathbf{1})(\text{Y})$  digested in  $25\mu\text{L}$  of concentrated  $\text{HCl}$  in  $\text{d}_6\text{-DMSO}$ . These data indicate the presence of the organic ligand  $\text{OBA}^{2-}$  as well as  $2(\text{CH}_3)\text{NH}_2^+$  and DMF molecules in  $((\text{CH}_3)_2\text{NH}_2)^+_2(\mathbf{1})(\text{Y})$ .  $^1\text{H}$  NMR ( $\text{d}_6\text{-DMSO}$ ):  $\delta$  2.42 (t, 6H,  $\text{CH}_3$ ,  $2((\text{CH}_3)\text{NH}_2^+)$ ),  $\delta$  2.5 (q, 6H, residual solvent peaks),  $\delta$  2.64 (s, 3H,  $\text{CH}_3$ , DMF),  $\delta$  2.81 (s, 3H,  $\text{CH}_3$ , DMF),  $\delta$  7.04 (d, 4H, Ar-H,  $\text{OBA}^{2-}$ ),  $\delta$  7.86 (s, H,  $\text{CHO}$ , DMF),  $\delta$  7.88 (d, 4H, Ar-H,  $\text{OBA}^{2-}$ ),  $\delta$  8.72 (bs, 4H,  $\text{NH}_2$ ,  $2((\text{CH}_3)\text{NH}_2^+)$ ).

## Topological Analysis

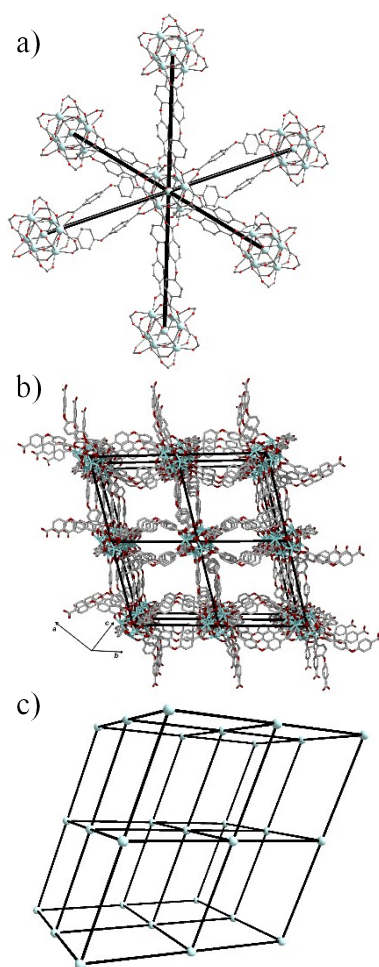

**Figure S4.** Topological analysis of  $((\text{CH}_3)_2\text{NH}_2^+)_2(\mathbf{1})(\text{RE})$  a) A pair of OBA<sup>2-</sup> ligands representing a single linkage between SBUs b) Representation of the interconnection between the SBUs in the 3D framework showing the underlying **pcu** topology. c) **pcu** topology of the  $((\text{CH}_3)_2\text{NH}_2^+)_2(\mathbf{1})(\text{RE})$ . Color code: Y, light blue; O, red; C, grey.



## Stability Studies

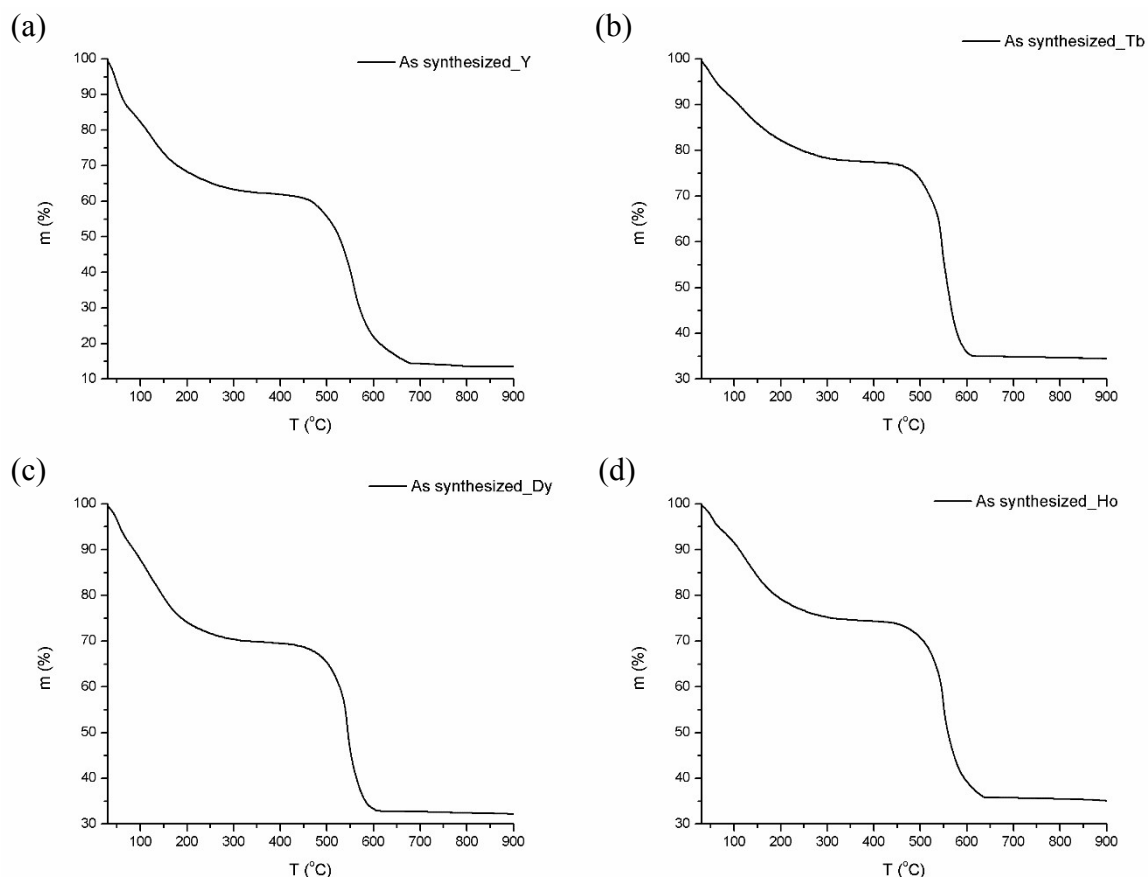

**Figure S5.** TGA graphs of the as synthesized compounds  $((\text{CH}_3)_2\text{NH}_2)^+_2(\mathbf{1})(\text{RE})$  ((a) RE = Y, (b) RE = Tb, (c) RE = Dy, (d) RE = Ho). TG analysis reveals that the thermal decomposition of compounds  $((\text{CH}_3)_2\text{NH}_2)^+_2(\mathbf{1})(\text{RE})$  proceeds via a two-step process. The first step (until  $\sim 470^\circ\text{C}$ ) is attributed to the removal of the lattice DMF molecules. The second mass loss which is completed at  $\sim 700^\circ\text{C}$  for  $((\text{CH}_3)_2\text{NH}_2)^+_2(\mathbf{1})(\text{Y})$  and at  $\sim 650^\circ\text{C}$  for  $((\text{CH}_3)_2\text{NH}_2)^+_2(\mathbf{1})(\text{RE})$ ; RE = Tb, Dy, Ho) is attributed to the decomposition of the ligand  $\text{OBA}^{2-}$ . Lastly the residual mass at  $900^\circ\text{C}$  corresponds to the rare earth oxide of the corresponding  $\text{RE}^{\text{III}}$  ion. Details on calculated values for solvent removal and ligand decomposition along with the experimental values obtained from TG analysis are shown in Table S2.

**Table S2.** Calculated values for solvent removal and ligand combustion along with the experimental values obtained from TG analysis for the as synthesized compounds  $((\text{CH}_3)_2\text{NH}_2)^+_2(\mathbf{1})(\text{RE})$

| Compound<br>$((\text{CH}_3)_2\text{NH}_2)^+_2(\mathbf{1})(\text{RE})$       | Lattice Solvent Removal |                               |      | Ligand and $(\text{CH}_3)_2\text{NH}_2^+$ Combustion |                               | Residual Oxide   |                               |                         |
|-----------------------------------------------------------------------------|-------------------------|-------------------------------|------|------------------------------------------------------|-------------------------------|------------------|-------------------------------|-------------------------|
|                                                                             | Temperature (°C)        | Experimental (Calculated) (%) | xDMF | Temperature (°C)                                     | Experimental (Calculated) (%) | Temperature (°C) | Experimental (Calculated) (%) | Formula                 |
| $((\text{CH}_3)_2\text{NH}_2)^+_2(\mathbf{1})(\text{Y}) \cdot x\text{DMF}$  | 470                     | 40 (40.2)                     | 21   | 700                                                  | 44 (42.5)                     | 900              | 16 (17.8)                     | $\text{Y}_2\text{O}_3$  |
| $((\text{CH}_3)_2\text{NH}_2)^+_2(\mathbf{1})(\text{Tb}) \cdot x\text{DMF}$ | 470                     | 25 (25)                       | 12.5 | 650                                                  | 40 (39)                       | 900              | 35 (31)                       | $\text{Tb}_4\text{O}_7$ |
| $((\text{CH}_3)_2\text{NH}_2)^+_2(\mathbf{1})(\text{Dy}) \cdot x\text{DMF}$ | 470                     | 30 (31)                       | 17   | 650                                                  | 38.5 (41)                     | 900              | 31.5 (28)                     | $\text{Dy}_2\text{O}_3$ |
| $((\text{CH}_3)_2\text{NH}_2)^+_2(\mathbf{1})(\text{Ho}) \cdot x\text{DMF}$ | 470                     | 25 (25.5)                     | 13   | 650                                                  | 41 (44)                       | 900              | 34 (30.5)                     | $\text{Ho}_2\text{O}_3$ |

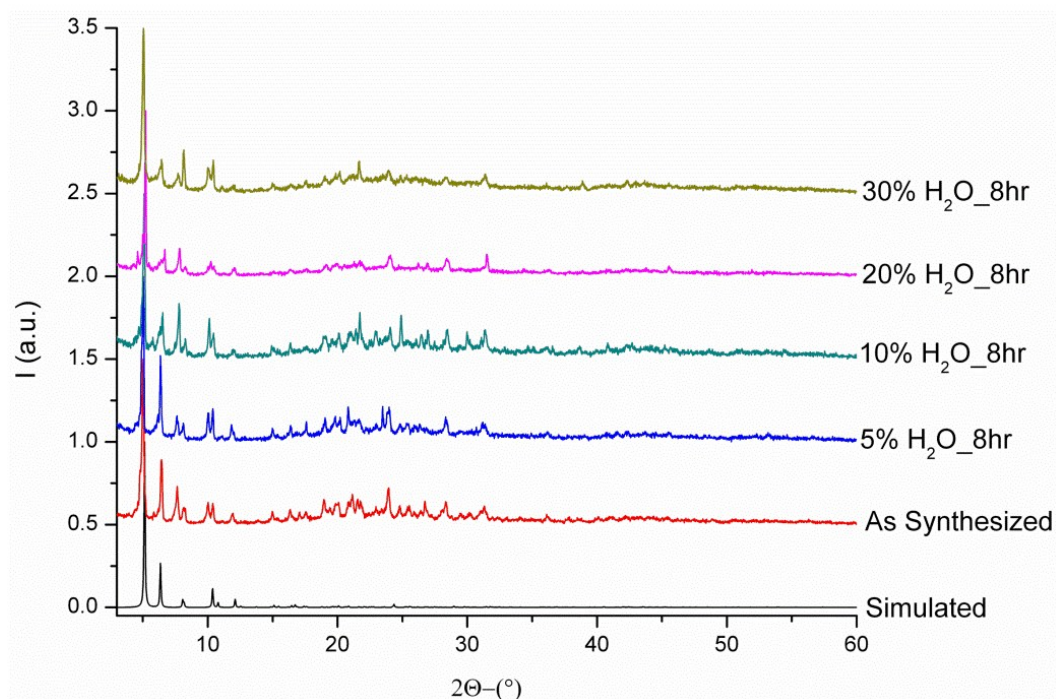

**Figure S6.** Powder X-ray diffraction patterns of as synthesized  $((\text{CH}_3)_2\text{NH}_2)^+{}_2(\mathbf{1})(\text{Y})$  treated (as described in the experimental part) in the aqueous DMF solutions for 8hrs.

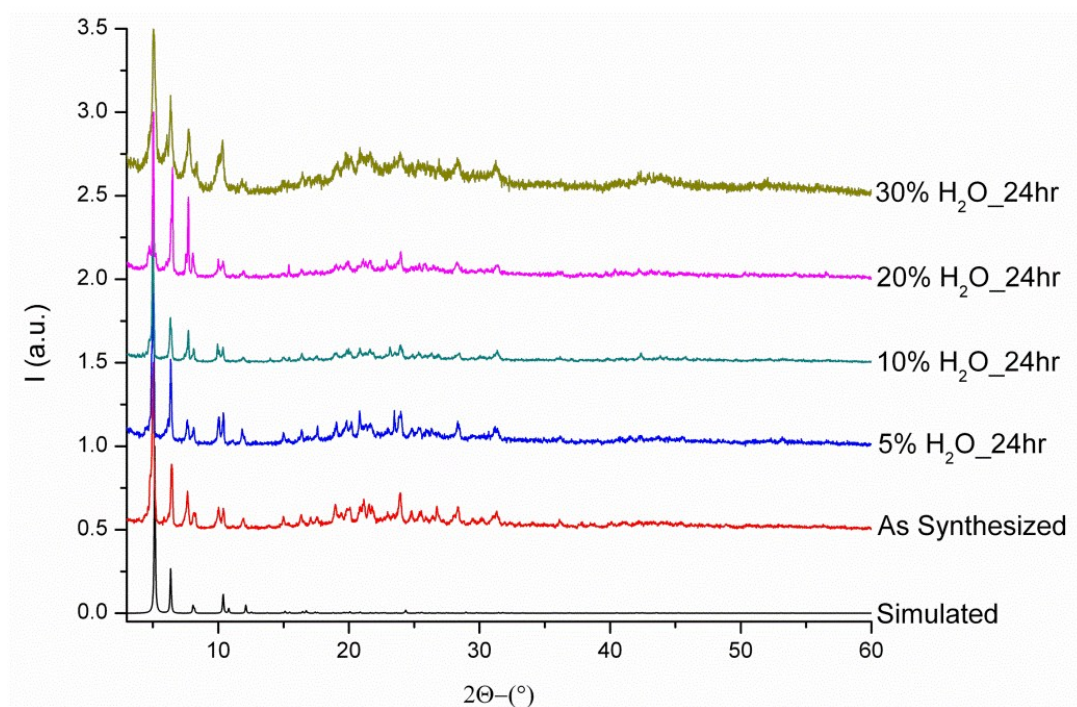

**Figure S7.** Powder X-ray diffraction patterns of as synthesized  $((\text{CH}_3)_2\text{NH}_2)^+{}_2(\mathbf{1})(\text{Y})$  treated (as described in the experimental part) in the aqueous DMF solutions for 24hrs.

### Characterization of Na<sup>+</sup>- and Mg<sup>2+</sup>- exchanged analogues

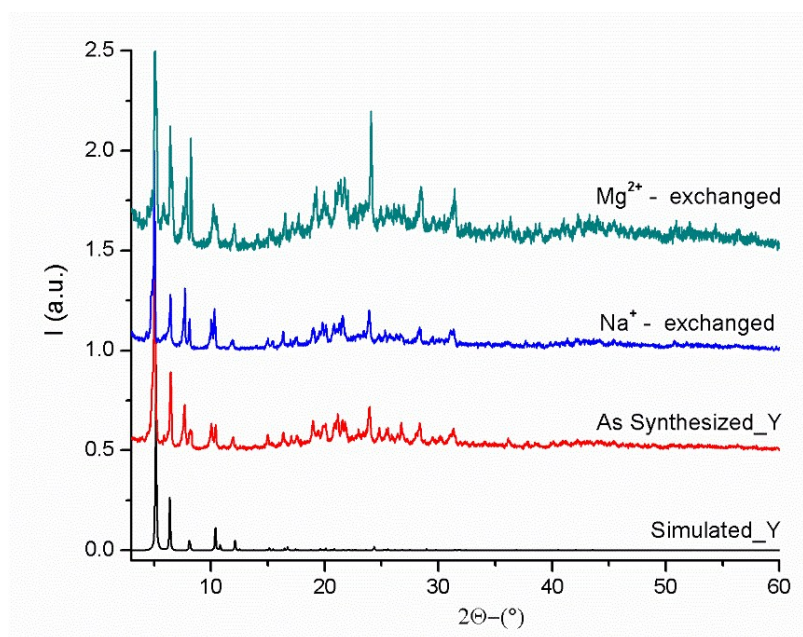

**Figure S8.** Powder X-ray diffraction patterns of  $((\text{CH}_3)_2\text{NH}_2)^+_2(\mathbf{1})(\text{Y})$  treated (as described in the experimental part) with a 0.5M DMF solution of the corresponding metal nitrate salt indicated in the figure.

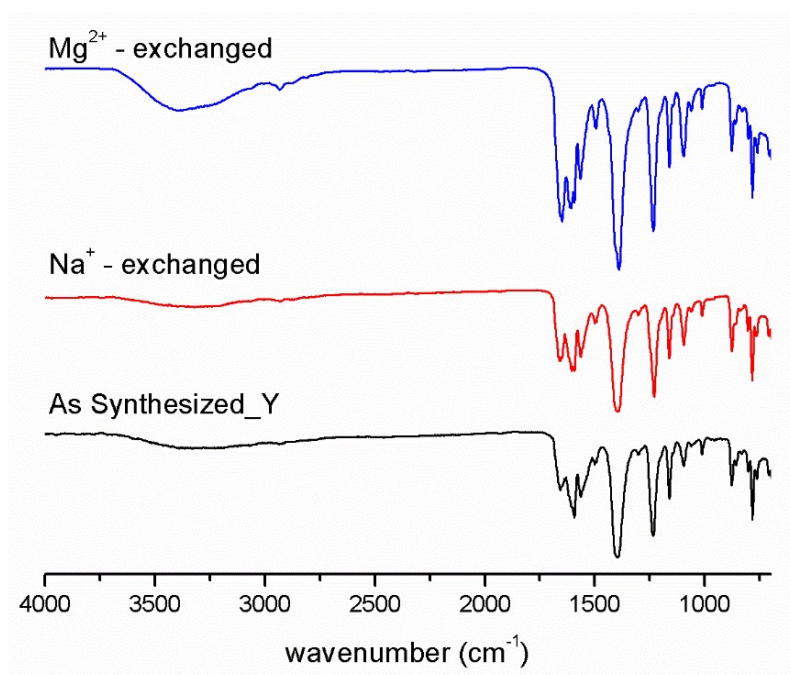

**Figure S9.** IR spectra of  $((\text{CH}_3)_2\text{NH}_2)^+_2(\mathbf{1})(\text{Y})$  treated (as described in the experimental part) with a 0.5M DMF solution of the corresponding metal nitrate salt indicated in the figure.

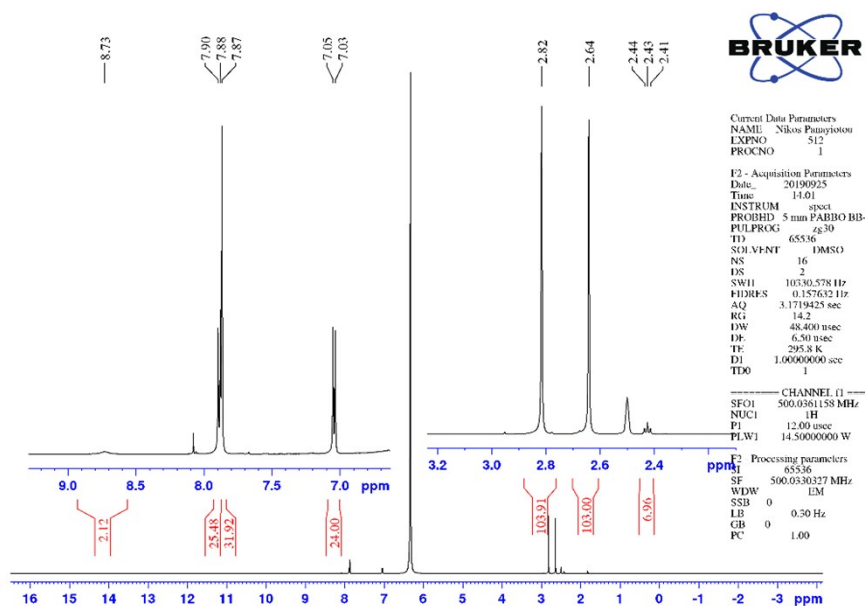

**Figure S10.**  $^1\text{H}$ -NMR spectrum of  $((\text{CH}_3)_2\text{NH}_2)^+_2(\mathbf{1})(\text{Y})$  crystals after partial exchange of the  $(\text{CH}_3)\text{NH}_2^+$  ions with  $\text{Na}^+$  digested in  $25\mu\text{L}$  concentrated  $\text{HCl}$  in  $d_6$ -DMSO. These data indicate the presence of the organic ligand  $\text{OBA}^{2-}$  as well as DMF and  $((\text{CH}_3)\text{NH}_2^+)$  in  $(\mathbf{1})(\text{Y})^{2-}$  although the latter are partially replaced by  $\text{Na}^+$  ions as revealed by the integration of the  $^1\text{H}$ -NMR peaks assigned to  $((\text{CH}_3)\text{NH}_2^+)$  which is decreased compared to the corresponding one of the pristine material shown in Fig. S4. Exact assignment of the  $^1\text{H}$ -NMR peaks is given in Figure S4.

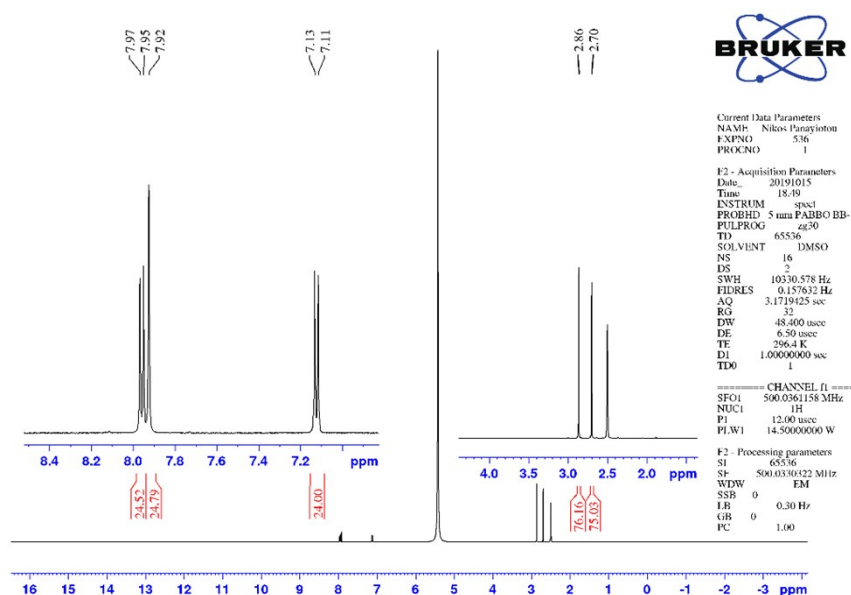

**Figure S11.**  $^1\text{H}$ -NMR spectrum of  $\text{Na}_2(\mathbf{1})(\text{Y})$  digested in  $25\mu\text{L}$  concentrated  $\text{HCl}$  in  $d_6$ -DMSO. These data indicate the presence of the organic ligand  $\text{OBA}^{2-}$  and DMF in  $(\mathbf{1})(\text{Y})^{2-}$  and the absence of  $((\text{CH}_3)_2\text{NH}_2^+)$  which is completely replaced by  $\text{Na}^+$ . Exact assignment of the  $\text{OBA}^{2-}$  and DMF  $^1\text{H}$ -NMR peaks is given in Figure S4.

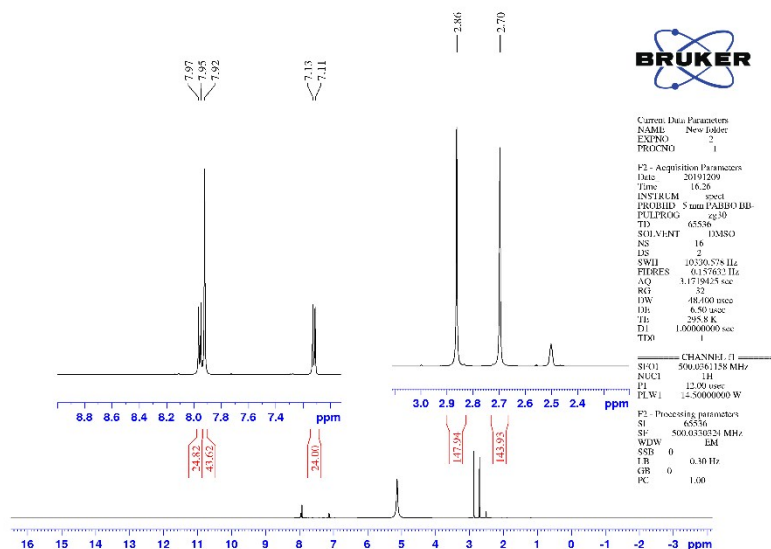

**Figure S12.**  $^1\text{H}$ -NMR spectrum of  $\text{Mg}(\mathbf{1})(\text{Y})$  digested in  $25\mu\text{L}$  concentrated  $\text{HCl}$  in  $\text{d}_6\text{-DMSO}$ . These data indicate the presence of the organic ligand  $\text{OBA}^{2-}$  and DMF in  $(\mathbf{1})(\text{Y})^{2-}$  and the absence of  $((\text{CH}_3)_2\text{NH}_2)^+$  which is completely replaced by  $\text{Mg}^{2+}$ . Exact assignment of the  $\text{OBA}^{2-}$  and DMF  $^1\text{H}$ -NMR peaks is given in Figure S4.



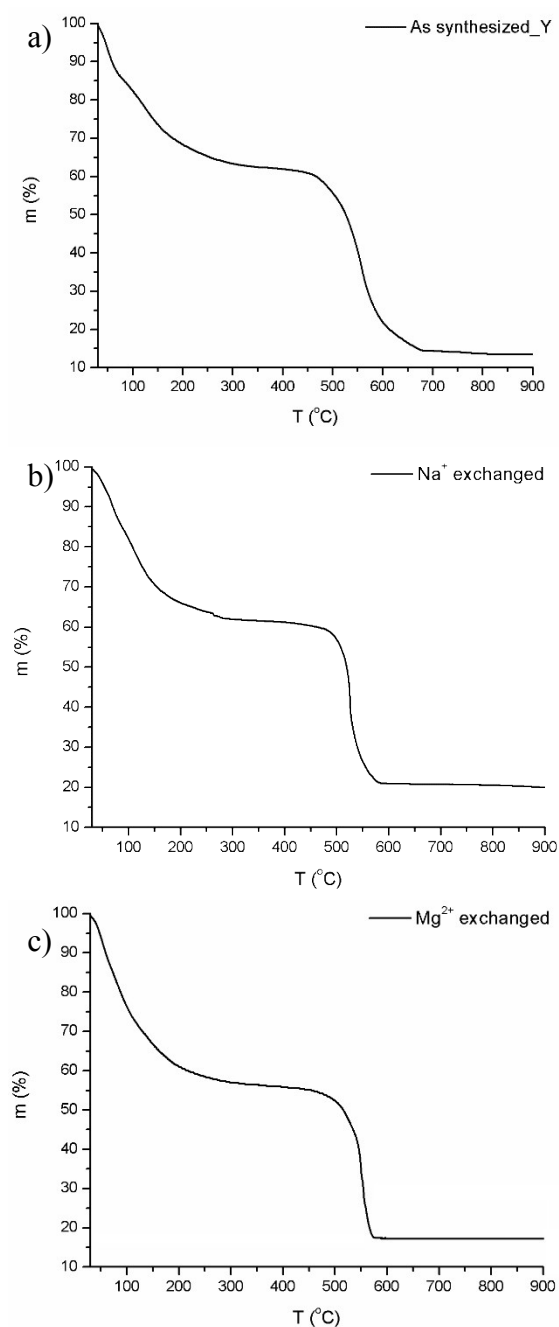

**Figure S13.** TGA curves of the  $\text{Na}^+$  - and  $\text{Mg}^{2+}$  - exchanged analogues and in particular of (a)  $((\text{CH}_3)_2\text{NH}_2)^+_2(\mathbf{1})(\text{Y})$ , (b)  $\text{Na}_2(\mathbf{1})(\text{Y})$  and (c)  $\text{Mg}(\mathbf{1})(\text{Y})$ . TG analysis reveals that the thermal decomposition of compounds  $\text{Na}_2(\mathbf{1})(\text{Y})$  and  $\text{Mg}(\mathbf{1})(\text{Y})$  proceeds via a two-step process. The first step (until  $\sim 470^\circ\text{C}$ ) is attributed to the removal of the lattice DMF molecules. The second mass loss which is completed at  $\sim 700^\circ\text{C}$  for  $((\text{CH}_3)_2\text{NH}_2)^+_2(\mathbf{1})(\text{Y})$  and at  $\sim 600^\circ\text{C}$  for two exchanged analogues is attributed to the decomposition of the ligand  $\text{OBA}^{2-}$ . Lastly the residual mass at  $900^\circ\text{C}$  corresponds to the mixed oxide of  $\text{Y}_2\text{O}_3/\text{Na}_2\text{O}$  or  $\text{Y}_2\text{O}_3/\text{MgO}$ . Details on calculated values for solvent removal and ligand combustion along with the experimental values obtained from TG analysis are listed in Table S3.

**Table S3.** Calculated values for solvent removal and ligand combustion along with the experimental values obtained from TG analysis for the as synthesized compound  $((\text{CH}_3)_2\text{NH}_2)^+_2(\mathbf{1})(\text{Y})$  and the exchanged analogues  $\text{Na}_2(\mathbf{1})(\text{Y})$  and  $\text{Mg}(\mathbf{1})(\text{Y})$ .

| $\text{M}_{(2/n)}(\mathbf{1})(\text{Y})$                                   | Lattice Solvent Removal |                               |      | Ligand Combustion |                               | Residual Oxide   |                               |                                                  |
|----------------------------------------------------------------------------|-------------------------|-------------------------------|------|-------------------|-------------------------------|------------------|-------------------------------|--------------------------------------------------|
|                                                                            | Temperature (°C)        | Experimental (Calculated) (%) | xDMF | Temperature (°C)  | Experimental (Calculated) (%) | Temperature (°C) | Experimental (Calculated) (%) | Formula                                          |
| $((\text{CH}_3)_2\text{NH}_2)^+_2(\mathbf{1})(\text{Y}) \cdot \text{xDMF}$ | 470                     | 40 (40.2)                     | 21   | 700               | 44 (42.5)                     | 900              | 16 (17.8)                     | $\text{Y}_2\text{O}_3$                           |
| $\text{Na}_2(\mathbf{1})(\text{Y}) \cdot \text{xDMF}$                      | 470                     | 40 (40)                       | 20.5 | 600               | 39 (40)                       | 900              | 21 (20)                       | $\text{Y}_2\text{O}_3 \cdot \text{Na}_2\text{O}$ |
| $\text{Mg}(\mathbf{1})(\text{Y}) \cdot \text{xDMF}$                        | 470                     | 45 (45.4)                     | 22   | 600               | 37.5 (36.7)                   | 900              | 17.5 (17.3)                   | $\text{Y}_2\text{O}_3 \cdot \text{MgO}$          |



## Gas Sorption Measurements

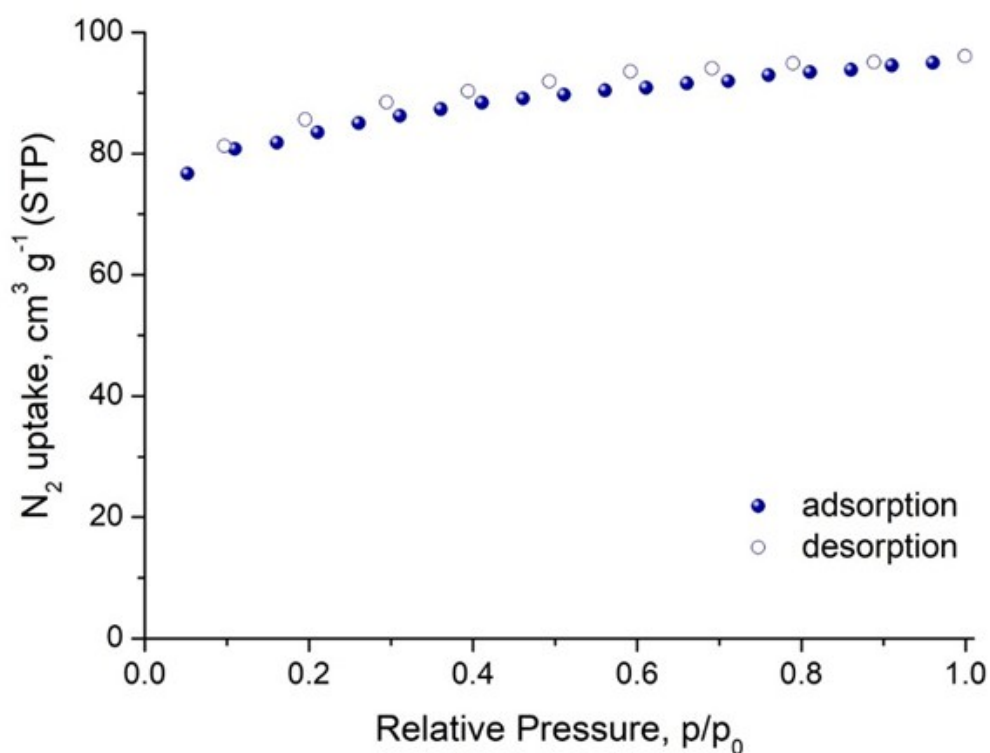

**Figure S14.**  $N_2$  adsorption isotherm of  $((CH_3)_2NH_2)^+_2(1)(Y)$  recorded at 77 K.

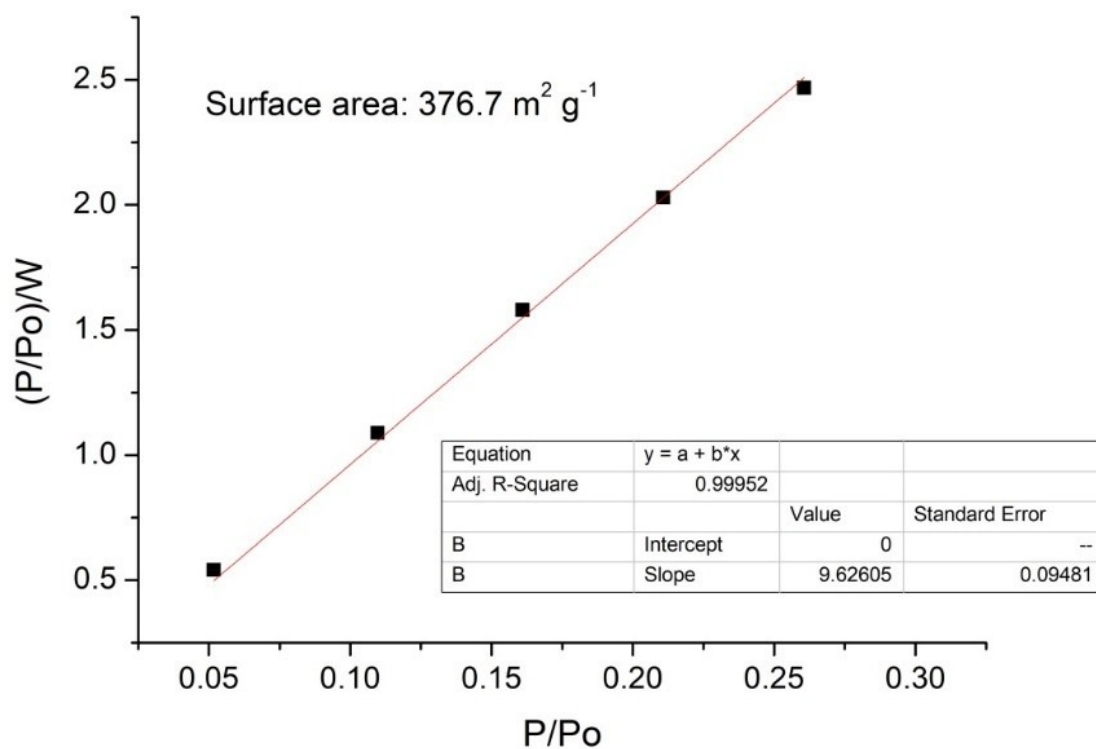

**Figure S15.** Langmuir plot for  $((CH_3)_2NH_2)^+_2(1)(Y)$  from  $N_2$  adsorption isotherm at 77K.

### Low pressure CO<sub>2</sub>, sorption isotherms, determination of heat of adsorption.

Heat of adsorption: To calculate heats of adsorptions, the corresponding adsorption isotherms at two different temperatures (77 K / 87 K for H<sub>2</sub> and 273 K / 293 K for CO<sub>2</sub> and CH<sub>4</sub>) were simultaneously fitted using the virial type<sup>6,7</sup> Equation 1:

$$\ln P = \ln N + \frac{1}{T} \sum_{i=0}^m a_i N^i + \sum_{i=0}^n b_i N^i \quad (1)$$

The heat of adsorption at zero coverage was calculated from Equation 2, where as a function of surface coverage, from Equation 3:

$$Q_{st} = -Ra_o \quad (2)$$

$$Q_{st}(N) = -R \sum_{i=0}^m a_i N^i \quad (3)$$

For the determination of the isosteric heat of adsorption using the Clausius - Clapeyron equation a commercially available software, ASiQwin (version 3.01) purchased from Quantachrome, was used.

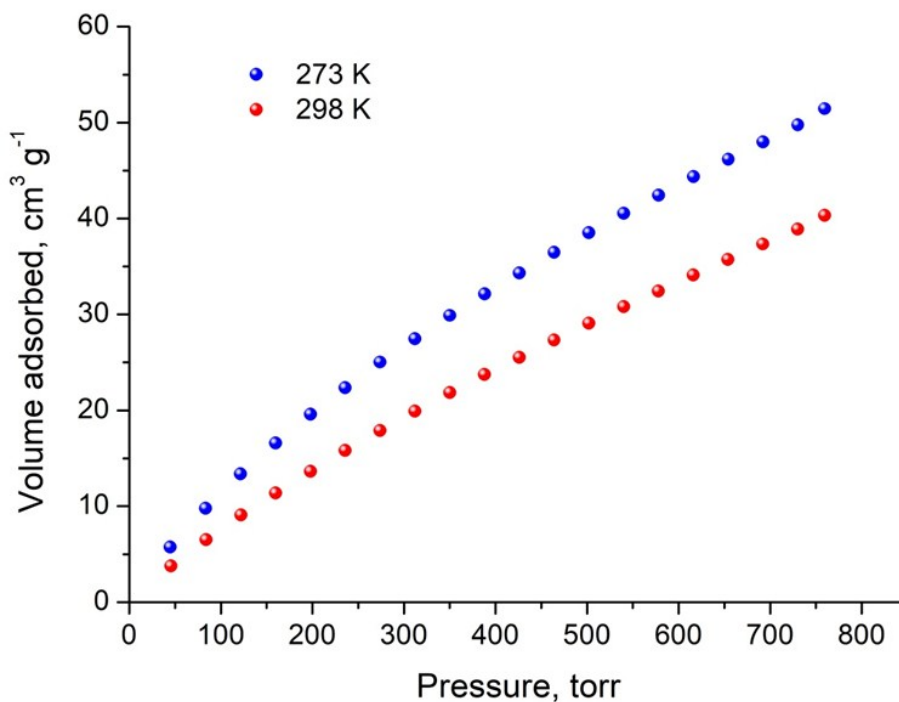

**Figure S16.** CO<sub>2</sub> adsorption isotherms of ((CH<sub>3</sub>)<sub>2</sub>NH<sub>2</sub>)<sub>2</sub>(1)(Y) at 273 K and 298 K.

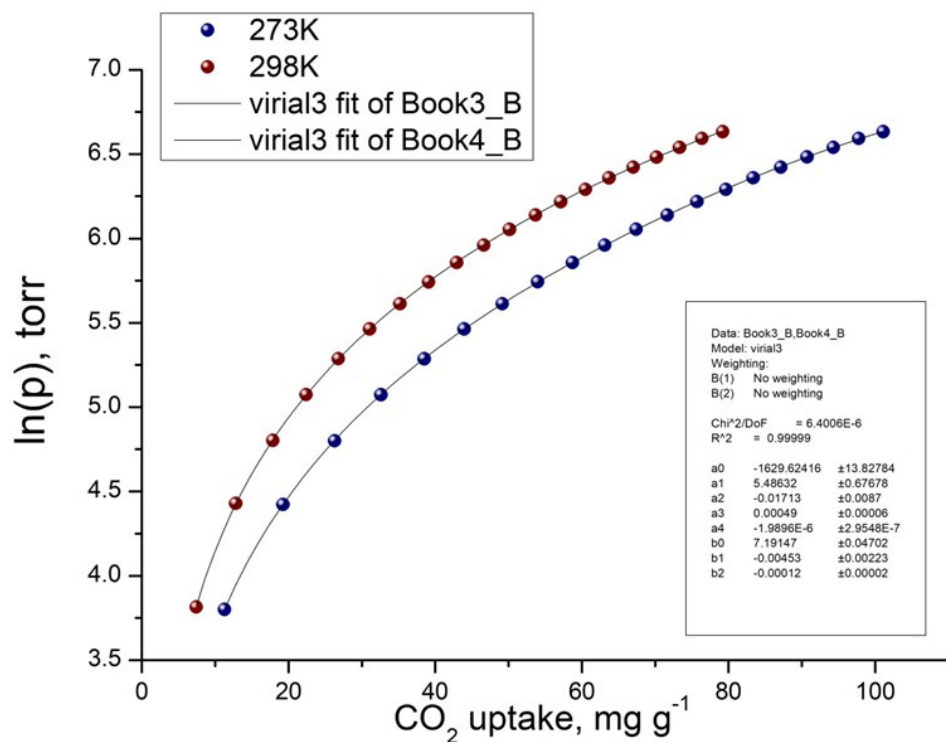

**Figure S17.** Virial type fitting of CO<sub>2</sub> adsorption isotherms of ((CH<sub>3</sub>)<sub>2</sub>NH<sub>2</sub>)<sub>2</sub>(1)(Y) at 273 K, and 298 K according to equation 1.

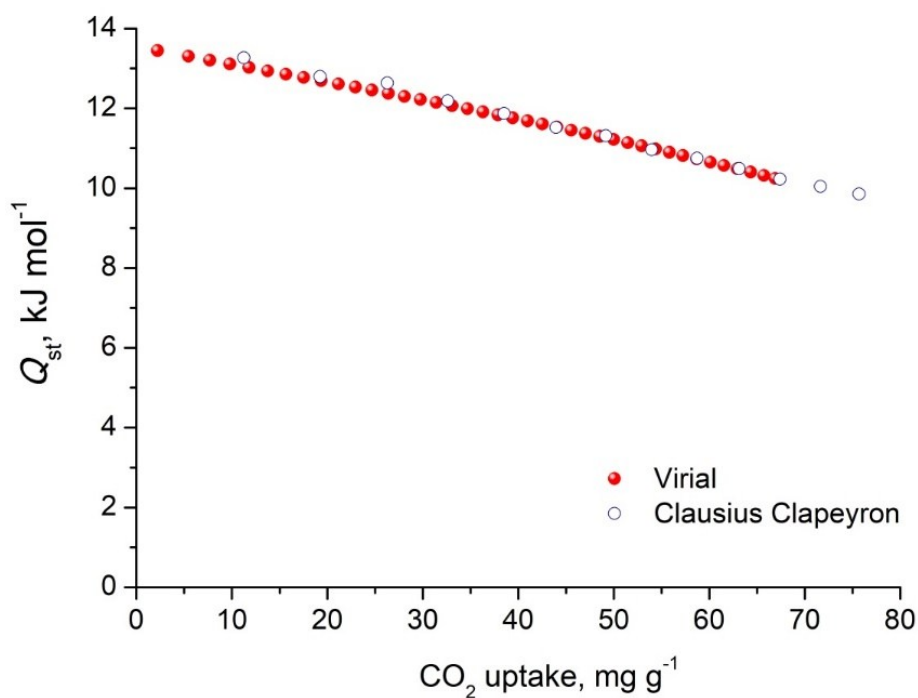

**Figure S18.** CO<sub>2</sub> isosteric heat of adsorption in ((CH<sub>3</sub>)<sub>2</sub>NH<sub>2</sub>)<sub>2</sub>(1)(Y) as a function of surface coverage.

## Photoluminescence Studies

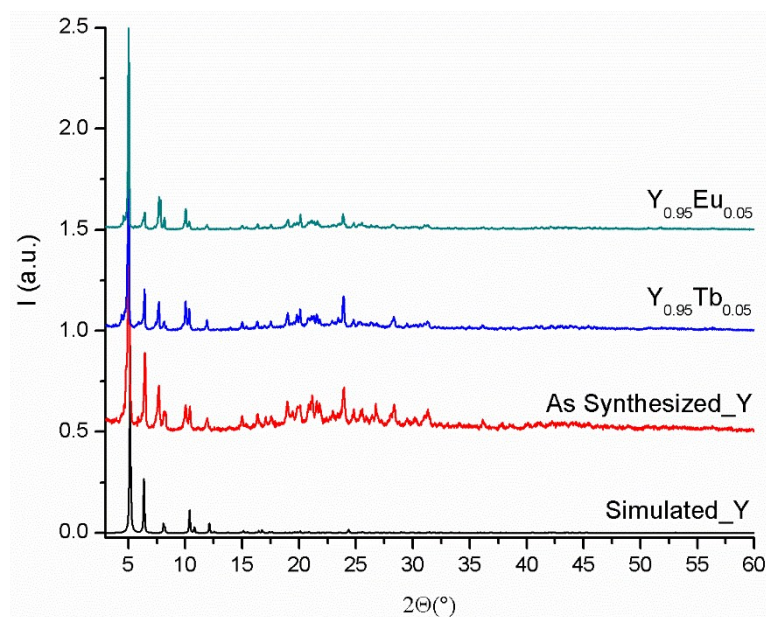

**Figure S19.** Powder X-ray diffraction patterns of the compound  $((CH_3)_2NH_2)^+_2(1)(Y)$  and doped analogues  $((CH_3)_2NH_2)^+_2(1)(Y_{0.95}Eu_{0.05})$  and  $((CH_3)_2NH_2)^+_2(1)(Y_{0.95}Tb_{0.05})$  along with the simulated pattern from the single crystal data.

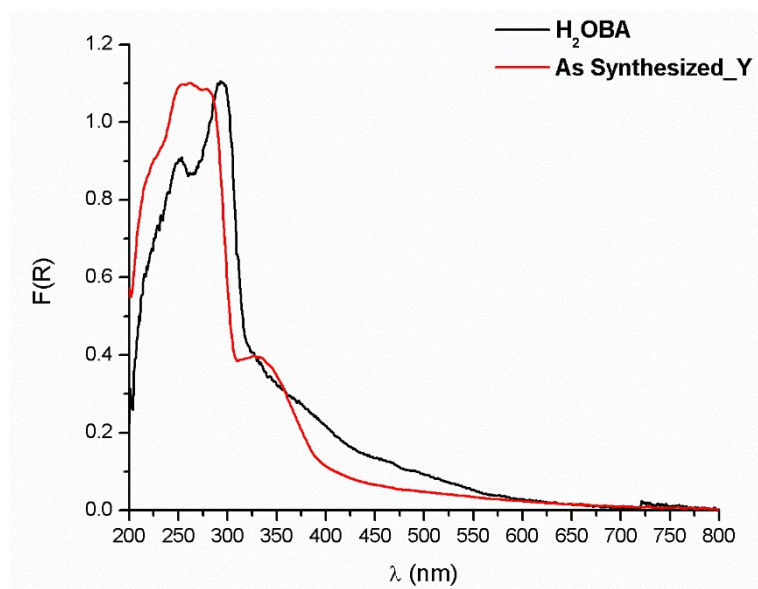

**Figure S20.** Solid state UV-Vis spectra recorded at room temperature of  $H_2OBA$  and the as synthesized compound  $((CH_3)_2NH_2)^+_2(1)(Y)$ .

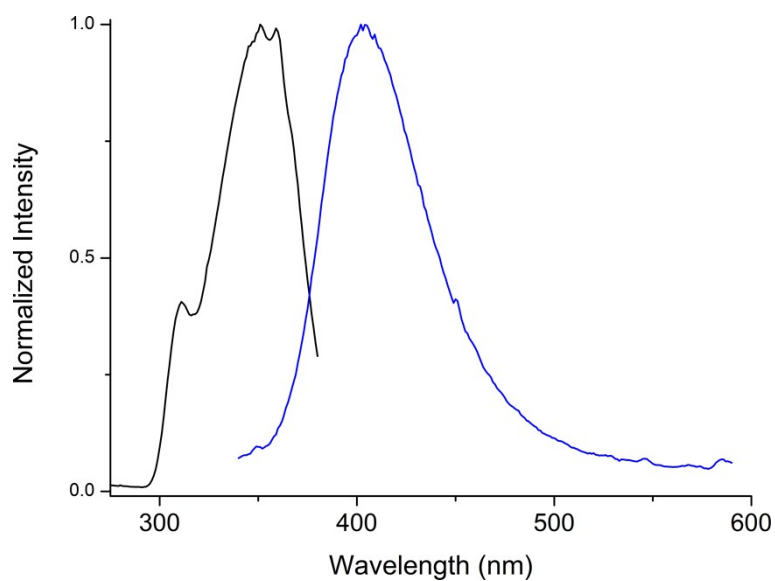

**Figure S21.** The emission ( $\lambda_{\text{exc}} = 310 \text{ nm}$ ) and excitation spectra of  $((\text{CH}_3)_2\text{NH}_2)^+{}_2(\mathbf{1})(\text{Y})$ .

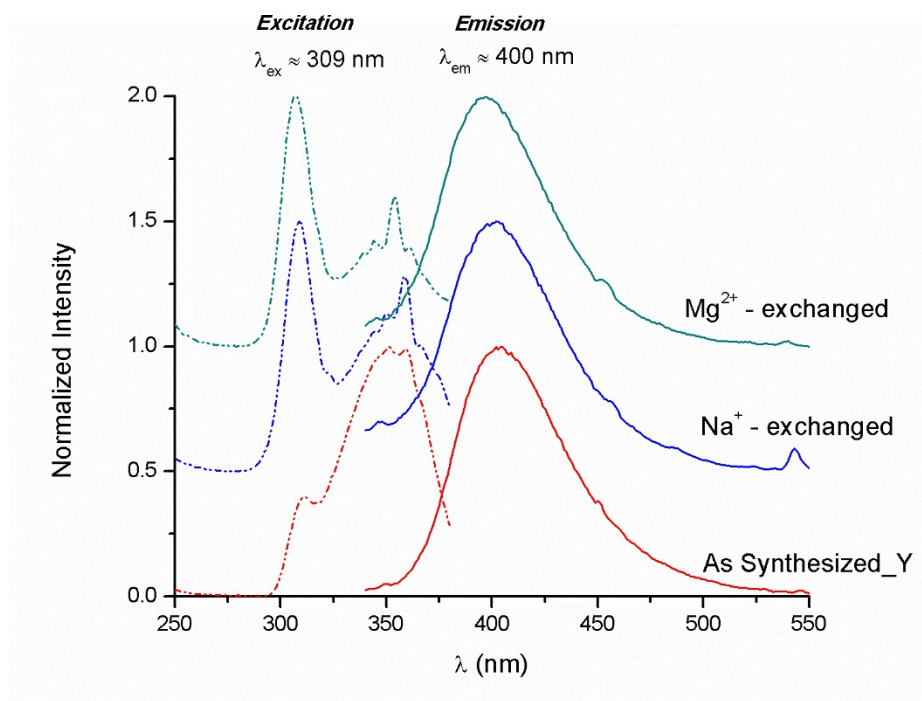

**Figure S22.** Solid state excitation ( $\lambda_{\text{em.}} = 404 \text{ nm}$ ) and emission ( $\lambda_{\text{exc.}} = 311 \text{ nm}$ ) at room temperature of  $((\text{CH}_3)_2\text{NH}_2)^+{}_2(\mathbf{1})(\text{Y})$  and the exchanged analogues  $\text{Na}_2(\mathbf{1})(\text{Y})$  and  $\text{Mg}(\mathbf{1})(\text{Y})$ .

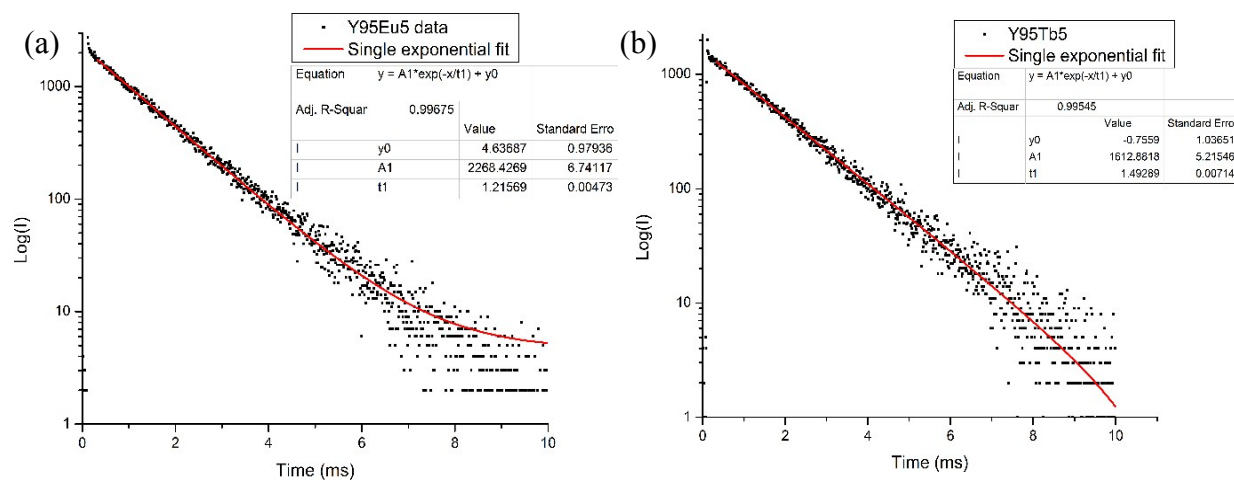

**Figure S23.** The decay of a)  $((\text{CH}_3)_2\text{NH}_2)^+_2(\mathbf{1})(\text{Y}_{0.95}\text{Eu}_{0.05})$  and b)  $((\text{CH}_3)_2\text{NH}_2)^+_2(\mathbf{1})(\text{Y}_{0.95}\text{Tb}_{0.05})$ .

## Cadmium/Mercury Sensing Studies

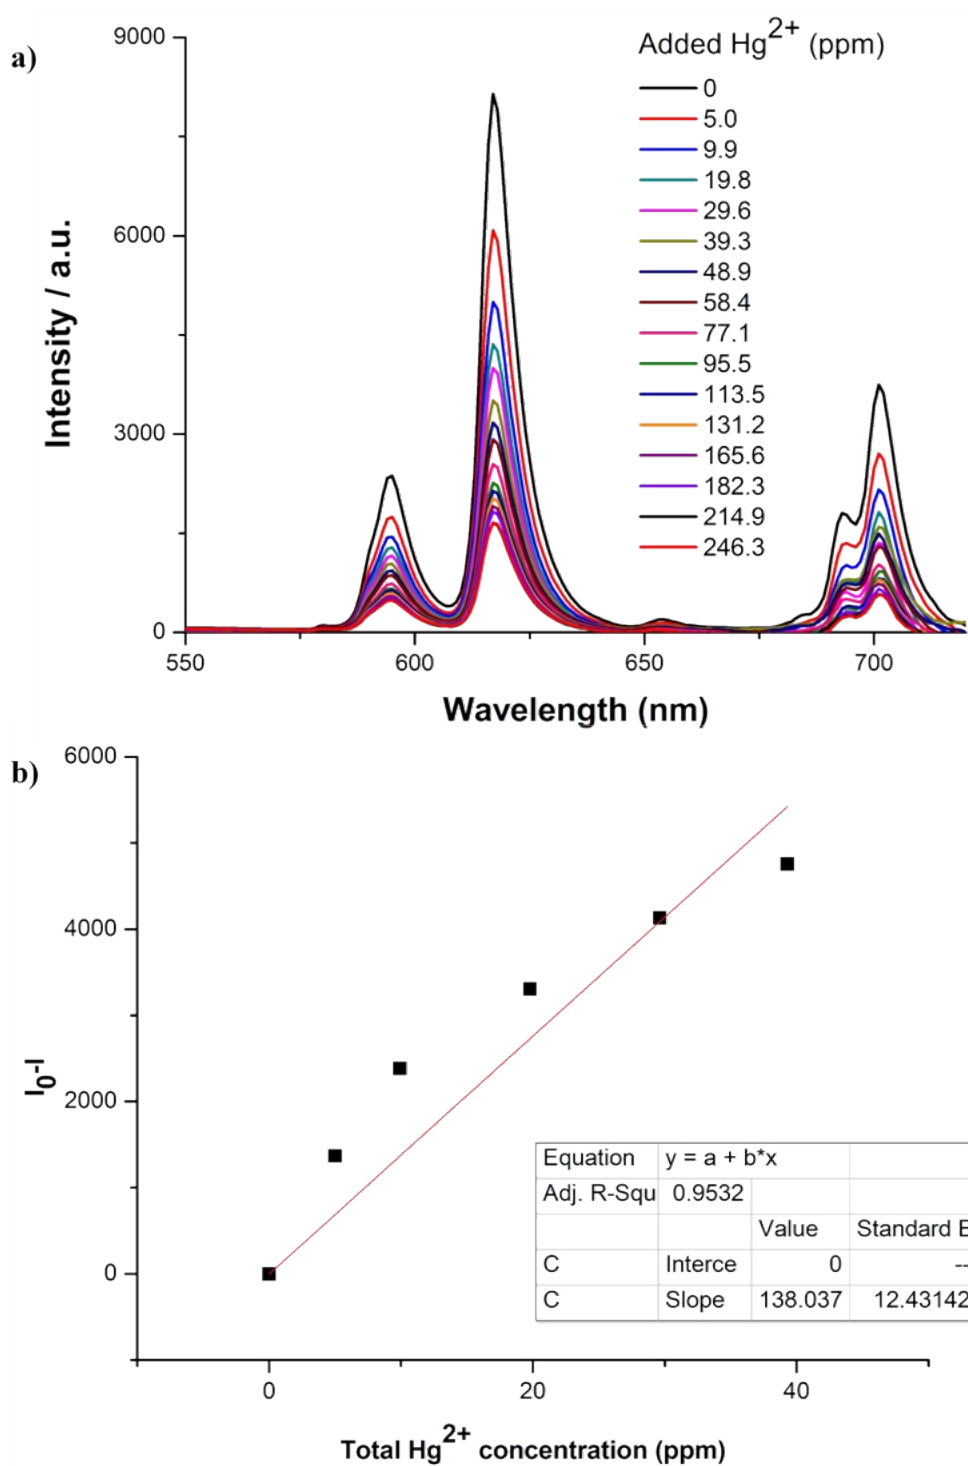

**Figure S24.** a) Luminescence titration of exchanged  $\text{Na}_2(1)(\text{Y}_{0.95}\text{Eu}_{0.05})$  suspended in DMF upon gradual addition of a  $10^{-2}$  M aqueous solution of  $\text{HgCl}_2$ . b) Calibration curve of the titration of a DMF suspension of  $\text{Na}_2(1)(\text{Y}_{0.95}\text{Eu}_{0.05})$  with  $\text{Hg}^{2+}$ .



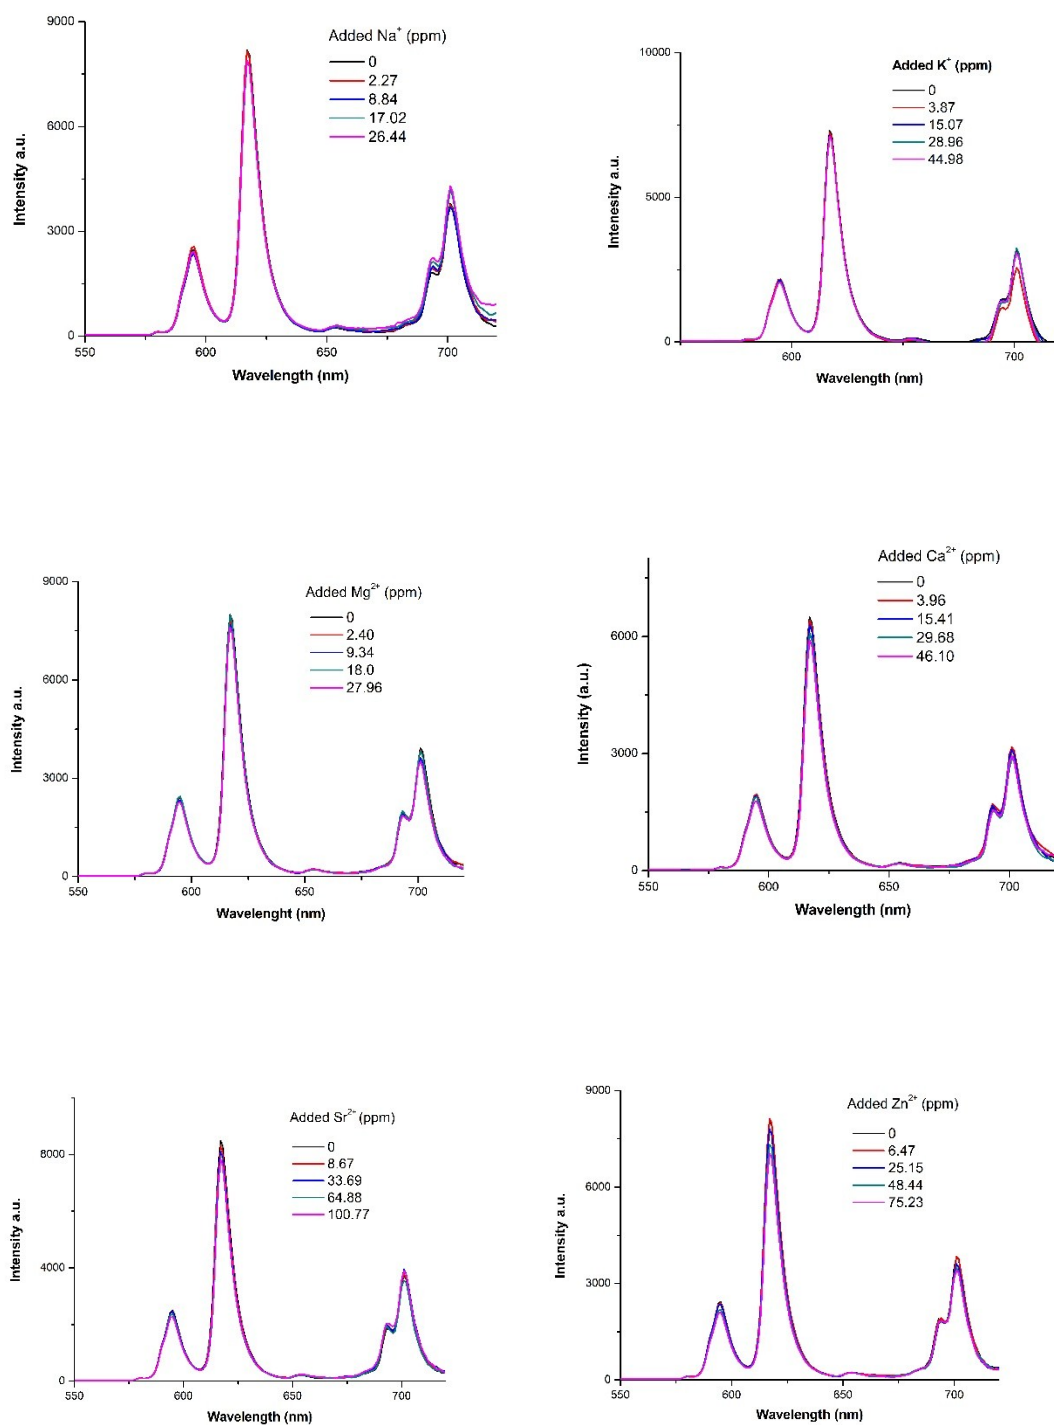

**Figure S25.** Results of control fluorescence titrations of DMF suspensions of  $\text{Na}_2(1)(\text{Y}_{0.95}\text{Eu}_{0.05})$  upon addition of aqueous solutions ( $10^{-2}$  M) of  $\text{Na}^+$ ,  $\text{K}^+$ ,  $\text{Mg}^{2+}$ ,  $\text{Ca}^{2+}$ ,  $\text{Sr}^{2+}$  and  $\text{Zn}^{2+}$ .



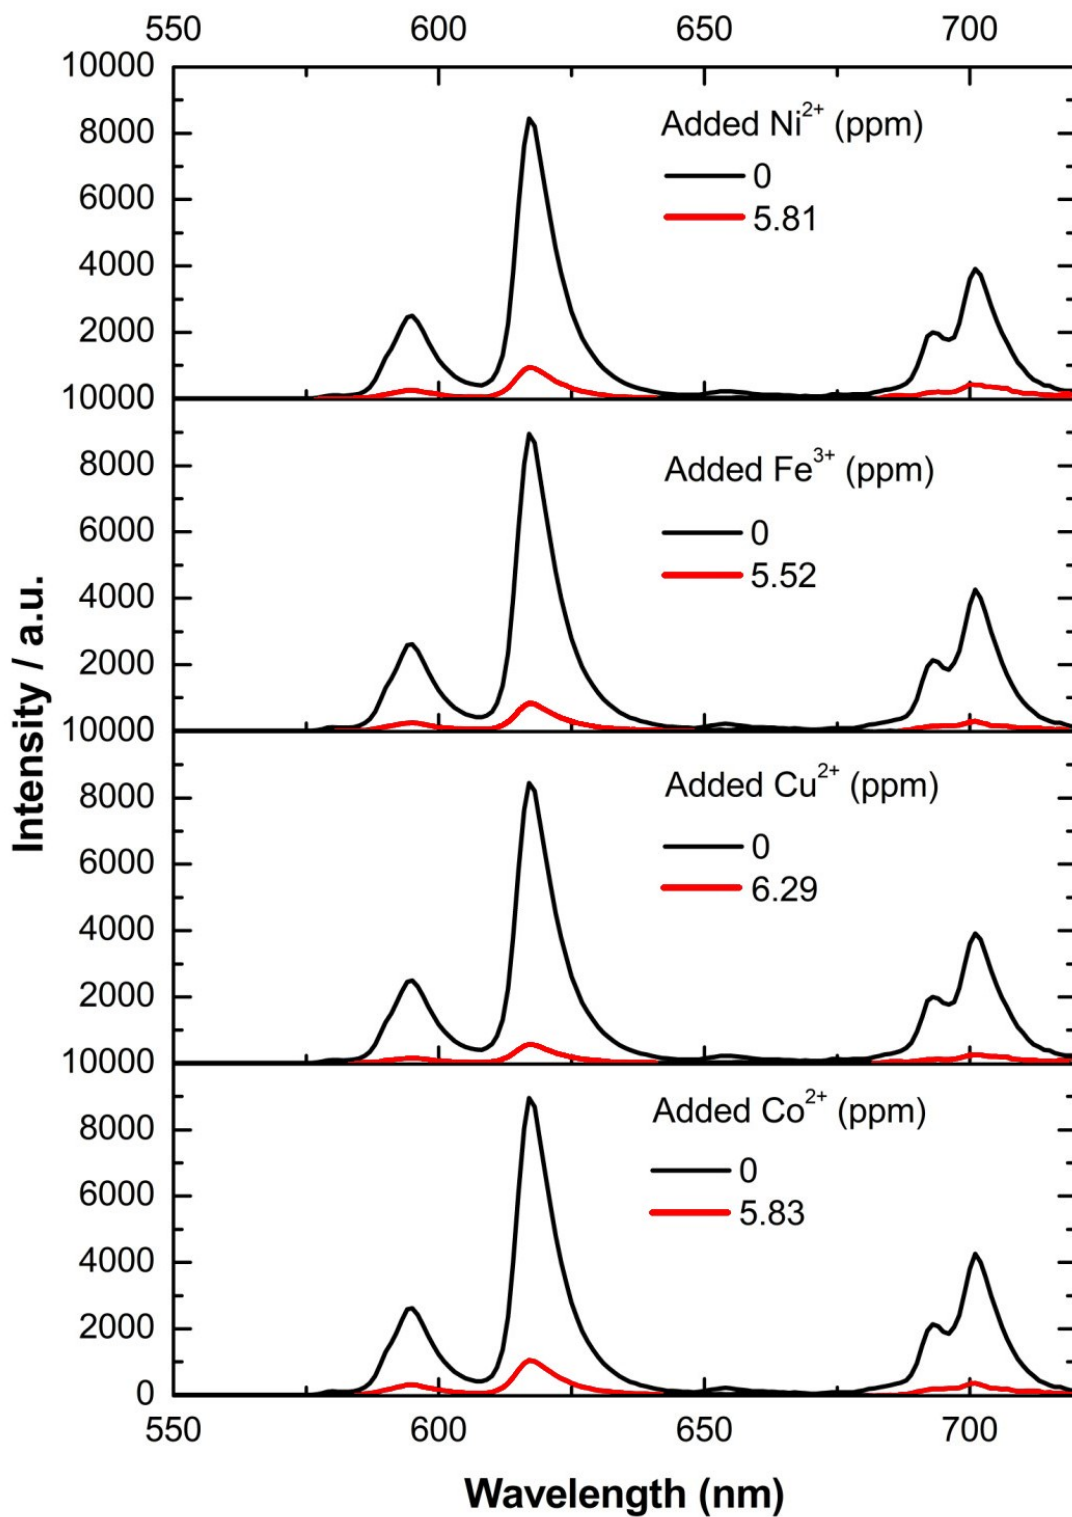

**Figure S26.** Quenching of the  $\text{Eu}^{3+}$  luminescence of  $\text{Na}_2(1)(\text{Y}_{0.95}\text{Eu}_{0.05})$  after addition of 20  $\mu\text{L}$  of  $10^{-2}$  M solutions of  $\text{Ni}^{2+}$ ,  $\text{Fe}^{3+}$ ,  $\text{Cu}^{2+}$  and  $\text{Co}^{2+}$  salts.

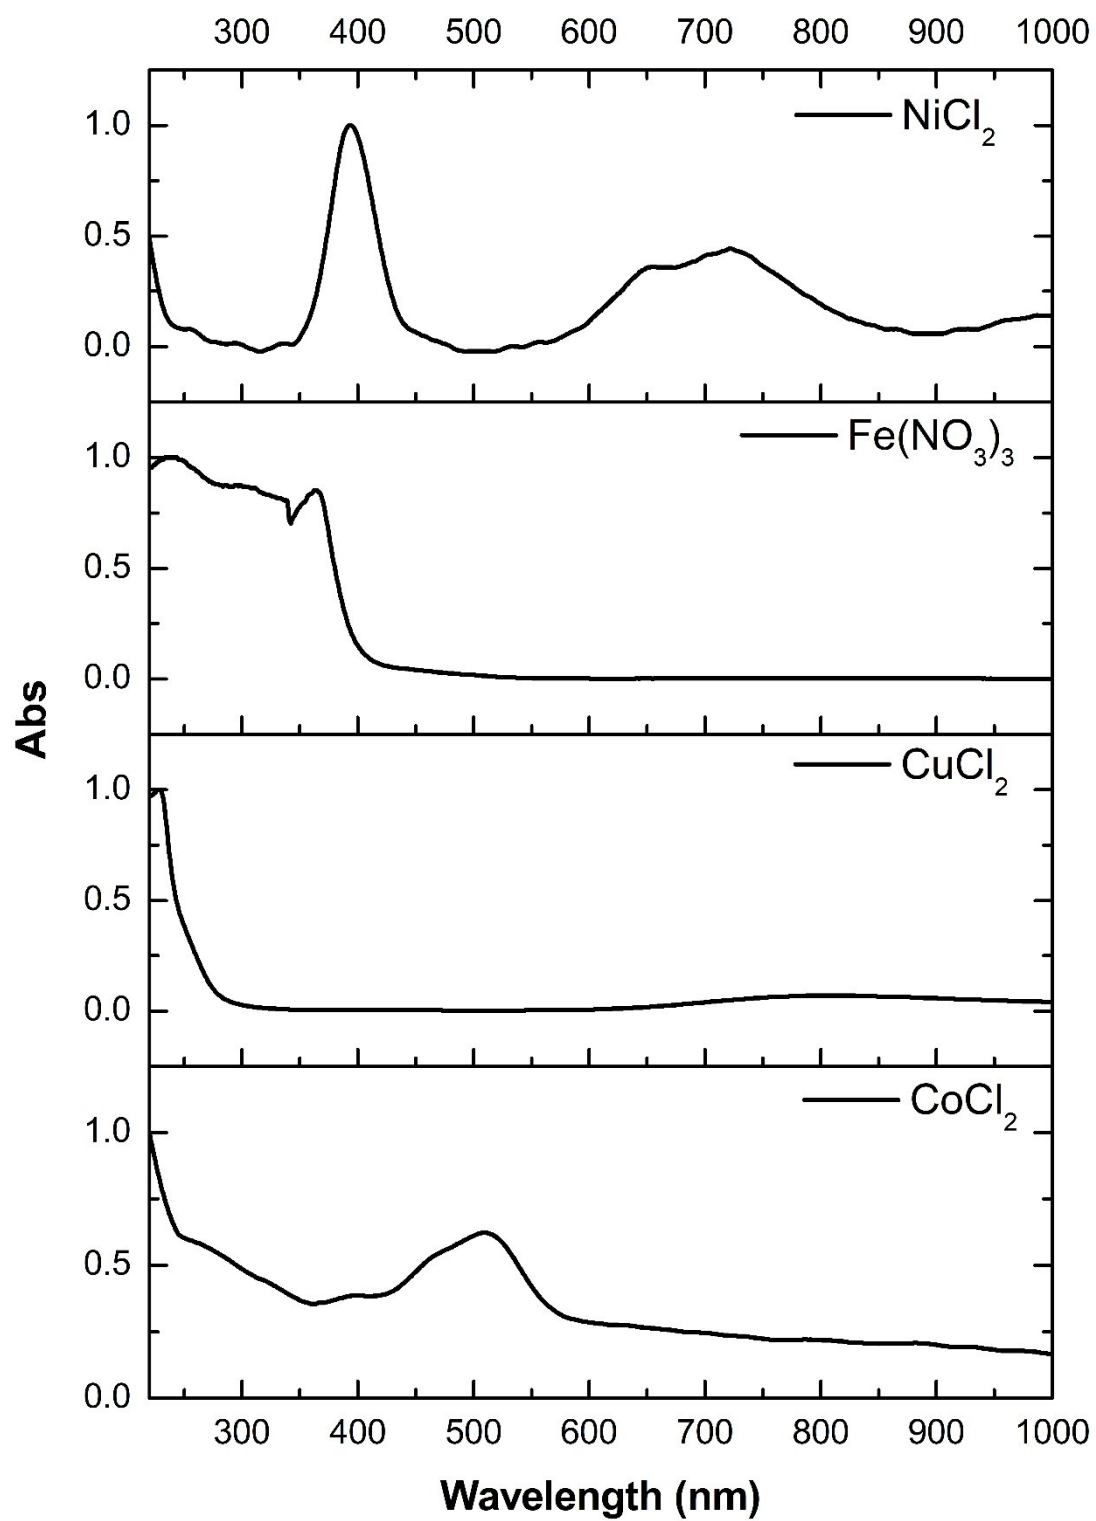

**Figure S27.** UV-vis absorption spectra of the 10<sup>-2</sup> M stock aqueous solutions of Ni<sup>2+</sup>, Fe<sup>3+</sup>, Cu<sup>2+</sup> and Co<sup>2+</sup>.

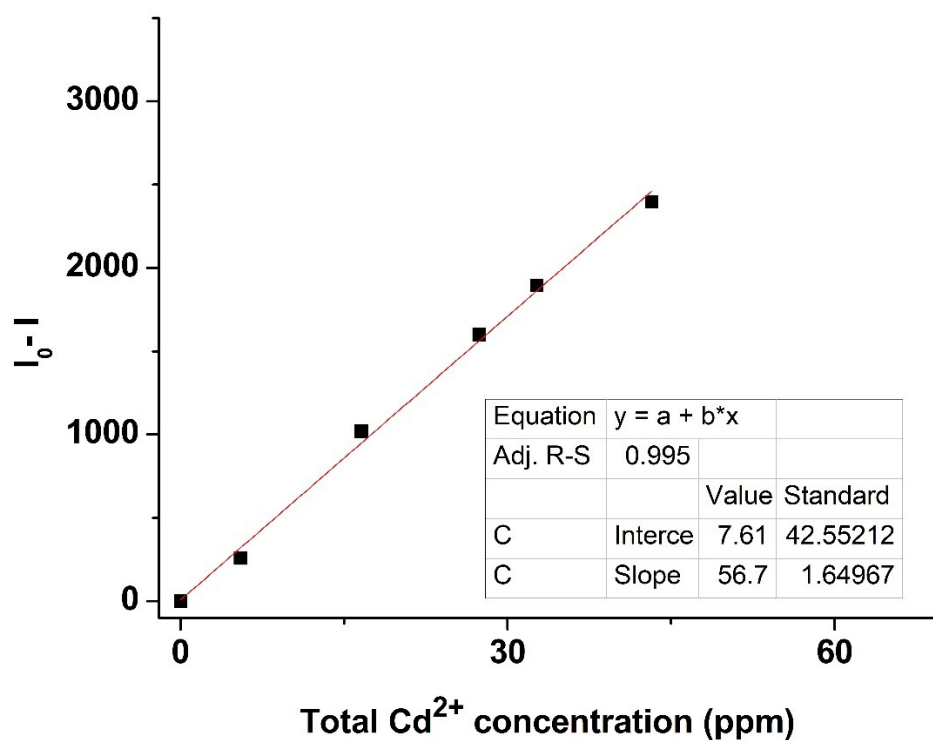

**Figure S28.** Calibration curve of the titration of a DMF suspension of  $((\text{CH}_3)_2\text{NH}_2)^+_2(\mathbf{1})(\text{Y}_{0.95}\text{Eu}_{0.05})$  with  $\text{Cd}^{2+}$ .

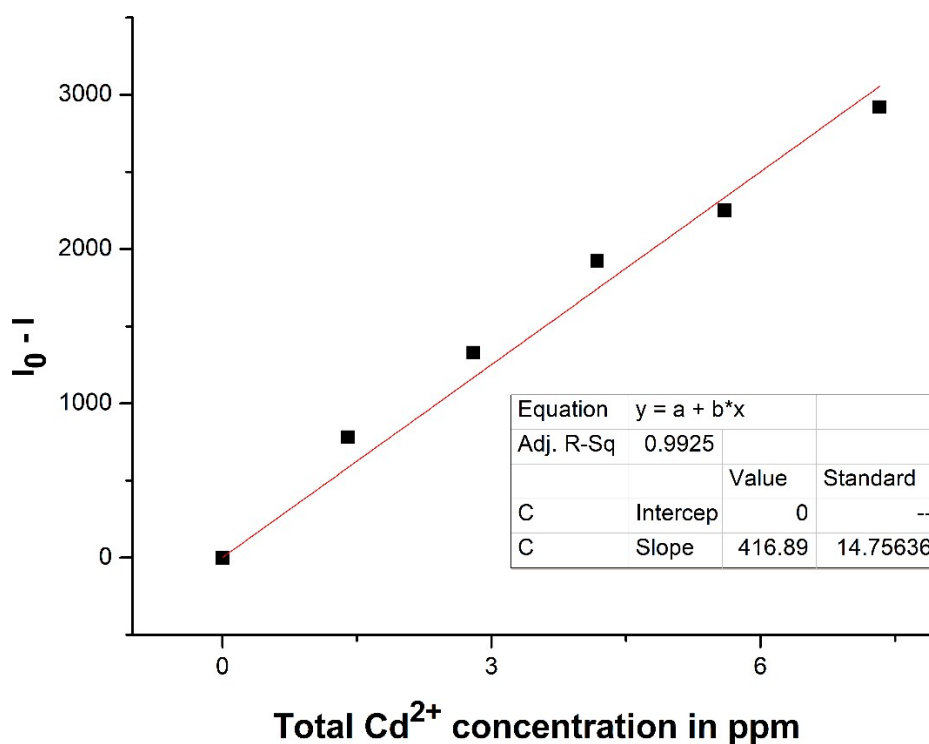

**Figure S29.** Calibration curve of the titration of a DMF suspension of  $\text{Na}_2(\mathbf{1})(\text{Y}_{0.95}\text{Eu}_{0.05})$  with  $\text{Cd}^{2+}$ .

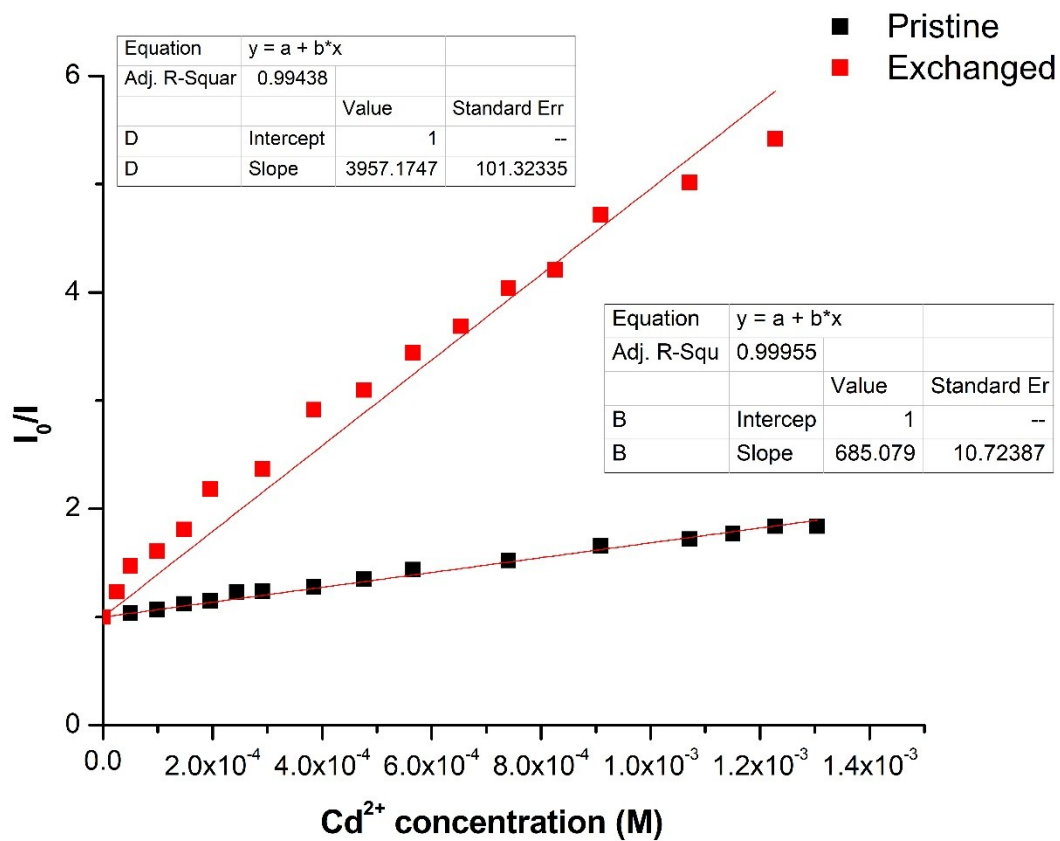

**Figure S30.** Stern-Volmer plots for  $((\text{CH}_3)_2\text{NH}_2)^+{}_2(\mathbf{1})(\text{Y}_{0.95}\text{Eu}_{0.05})$  (black squares) and  $\text{Na}_2(\mathbf{1})(\text{Y}_{0.95}\text{Eu}_{0.05})$  (red squares) and the corresponding linear fits indicated as solid lines.

### Regeneration of Na<sub>2</sub>@(1)(Y)

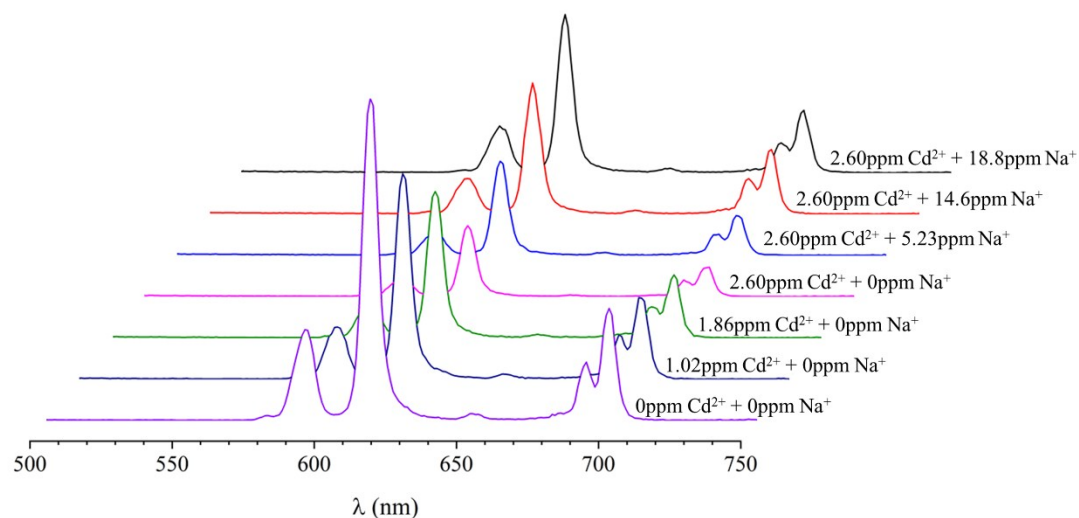

**Figure S31.** Luminescence spectra of Na<sub>2</sub>(1)(Y<sub>0.95</sub>Eu<sub>0.05</sub>) after the addition of increments of aqueous solution of CdCl<sub>2</sub>(0.1M) indicating the drop of the luminescence signal followed by saturated aqueous solution of NaCl resulting in the recovery of the luminescence signal.

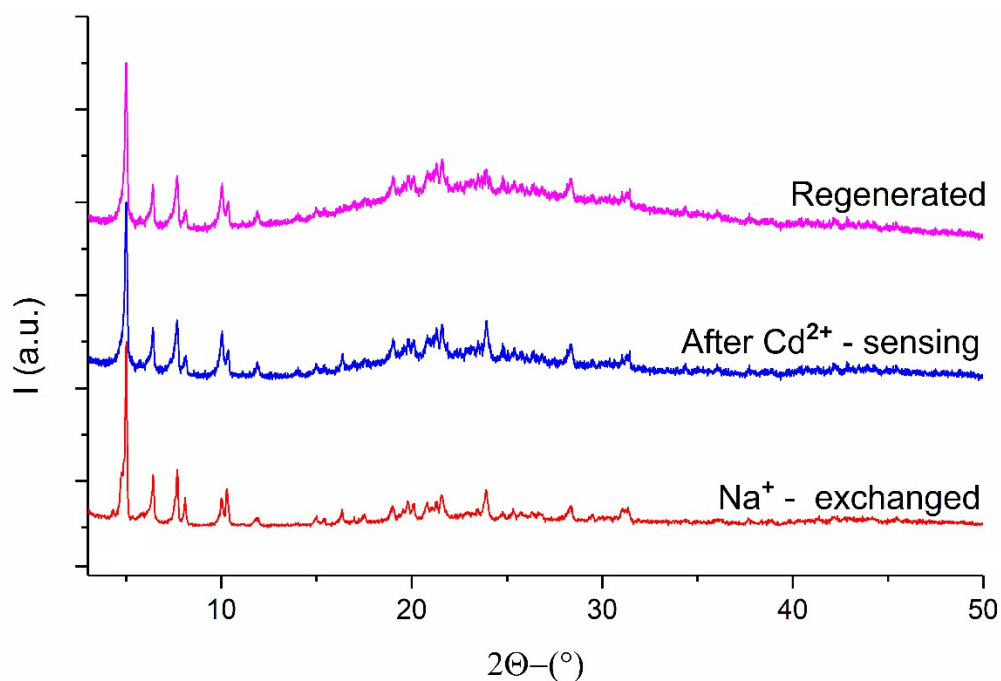

**Figure S32.** pXRD patterns of pristine Na<sub>2</sub>(1)(Y<sub>0.95</sub>Eu<sub>0.05</sub>), Cd<sup>2+</sup> - exchanged Cd(1)(Y<sub>0.95</sub>Eu<sub>0.05</sub>) i.e. the material isolated after Cd<sup>2+</sup> sensing studies and Na<sup>+</sup> - exchanged Na<sub>2</sub>(1)(Y<sub>0.95</sub>Eu<sub>0.05</sub>) after regeneration experiment.

## Cadmium Sorption Measurements

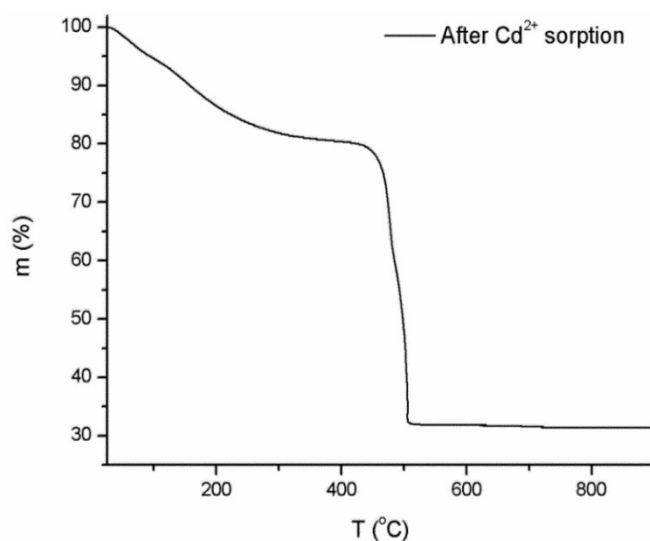

**Figure S33.** TGA graph of  $\text{Cd}^{2+}@\text{(1)(Y)}$  ( $\text{(1)(Y)}^{2-}$  containing  $\text{Cd}^{2+}$  into its pores). TG analysis reveals that the thermal decomposition of compound  $\text{Cd}^{2+}@\text{(1)(Y)}$  proceeds via a two-step process. The first step (until  $\sim 430^\circ\text{C}$ ) is attributed to the removal of the lattice DMF molecules (observed: 20%, calculated: 20%). The second mass loss which is completed at  $\sim 520^\circ\text{C}$  is attributed to the decomposition of the ligand  $\text{OBA}^{2-}$  (observed: 49%, calculated: 51%). Lastly the residual mass at  $900^\circ\text{C}$  corresponds to the mixed oxide of  $\text{Y}_2\text{O}_3$  and  $1.25\text{CdO}$  (observed: 31%, calculated: 29%).

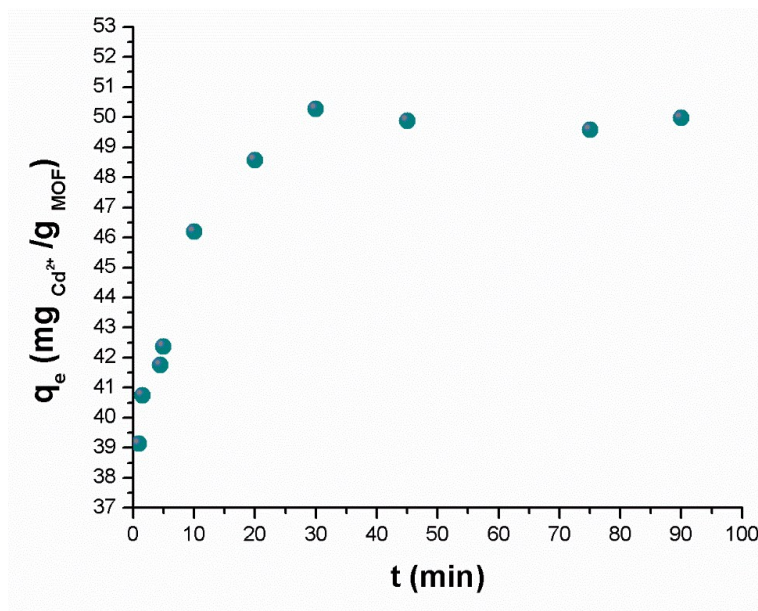

**Figure S34.** The kinetics of  $\text{Cd}^{2+}$  sorption by  $\text{Na}_2\text{(1)(Y)}$ ,  $C_{\text{in}} = 1 \text{ mM}$ ,  $m_{\text{sorbent}}: \text{Na}_2\text{(1)(Y)} = 0.066 \text{ g}$ ,  $V_{\text{solution}} = 100 \text{ ml}$  (70 ml DMF, 30 ml  $\text{H}_2\text{O}$ ) and  $T = 296 \pm 2 \text{ K}$ .



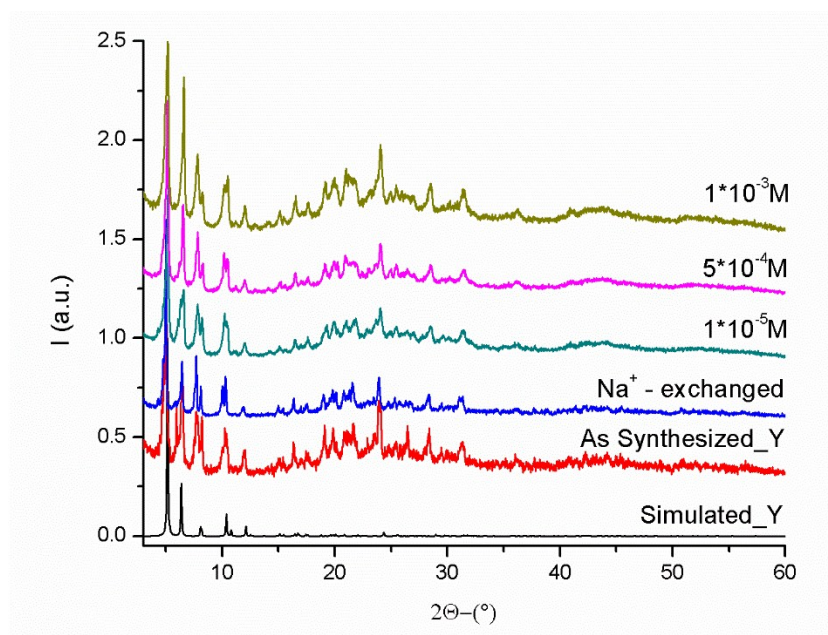

**Figure S35.** Powder X-ray diffraction patterns of  $\text{Cd}^{2+}@\text{(1)(Y)}$  ( $\text{(1)(Y)}^{2-}$  containing  $\text{Cd}^{2+}$  into its pores);  $C_{\text{in}}$  = shown in the figure, aqueous DMF solution (30%),  $t = 120$  min,  $m_{\text{sorbent}}$ :  $\text{Na}_2\text{(1)(Y)} = 0.033\text{g}$ ,  $V_{\text{solution}} = 30$  ml and  $T = 296 \pm 2$  K.

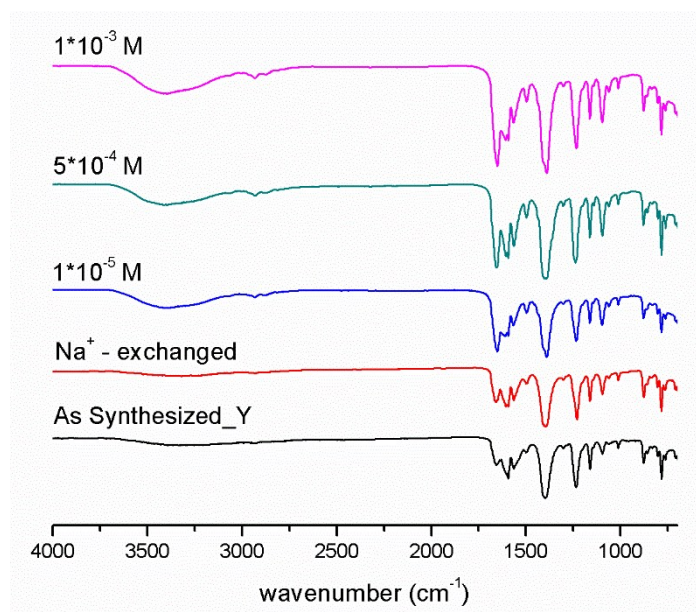

**Figure S36.** IR spectra of  $\text{Cd}^{2+}@\text{(1)(Y)}$  ( $\text{(1)(Y)}^{2-}$  containing  $\text{Cd}^{2+}$  into its pores);  $C_{\text{in}}$  = shown in the figure, aqueous DMF solution (30%),  $t = 120$  min,  $m_{\text{sorbent}}$ :  $\text{Na}_2\text{(1)(Y)} = 0.033\text{g}$ ,  $V_{\text{solution}} = 30$  ml and  $T = 296 \pm 2$  K.

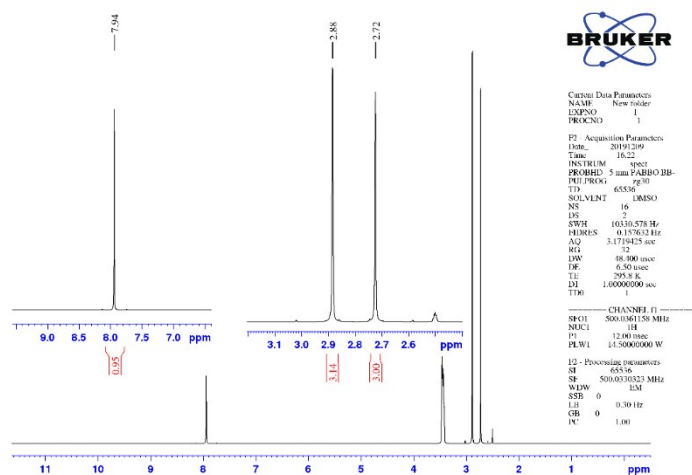

**Figure S37.**  $^1\text{H}$ -NMR spectrum of the solution after  $\text{Cd}^{2+}$  sorption experiment in  $\text{d}_6$ -DMSO.  $C_{\text{in}} = 5 \times 10^{-4} \text{M}$ , aqueous DMF solution (30%),  $t = 120 \text{ min}$ ,  $m_{\text{sorbent}} \cdot \text{Na}_2(\mathbf{1})(\text{Y}) = 0.033 \text{g}$ ,  $V_{\text{solution}} = 30 \text{ ml}$  and  $T = 296 \pm 2 \text{ K}$ . These data indicate only the presence of DMF in  $(\mathbf{1})(\text{Y})^{2-}$  and the absence of organic ligand  $\text{OBA}^{2-}$  in the solution. Exact assignment DMF  $^1\text{H}$ -NMR peaks is given in Figure S4.

### Proposed structure of $\text{Cd}^{2+}@\mathbf{(1)}(\text{Y})$ and $\text{Mg}^{2+}@\mathbf{(1)}(\text{Y})$ based on powder X-ray diffraction data

Several powder X-ray diffraction patterns were collected with  $0.01^\circ$  step and 2 sec exposure time on samples belonging to the same batch of  $\text{Cd}^{2+}@\mathbf{(1)}(\text{Y})$  and  $\text{Mg}^{2+}@\mathbf{(1)}(\text{Y})$ . The patterns were smoothed and their background was subtracted separately, and then were merged using the WinPLOTR<sup>11</sup> software. The resulting pattern was introduced to EXPO2014<sup>12</sup>, where indexing with implemented N-TREOR09<sup>13</sup> was performed. This, for  $\text{Cd}^{2+}@\mathbf{(1)}(\text{Y})$ , led to a trigonal cell slightly different from that of the pristine material obtained from single crystal data. Le Bail refinement led to unit cell parameters  $a = b = 27.579 \text{ \AA}$ ,  $c = 26.221 \text{ \AA}$ ,  $\alpha = \beta = 90^\circ$  and  $\gamma = 120^\circ$  (angles were fixed). (Fig. S37)



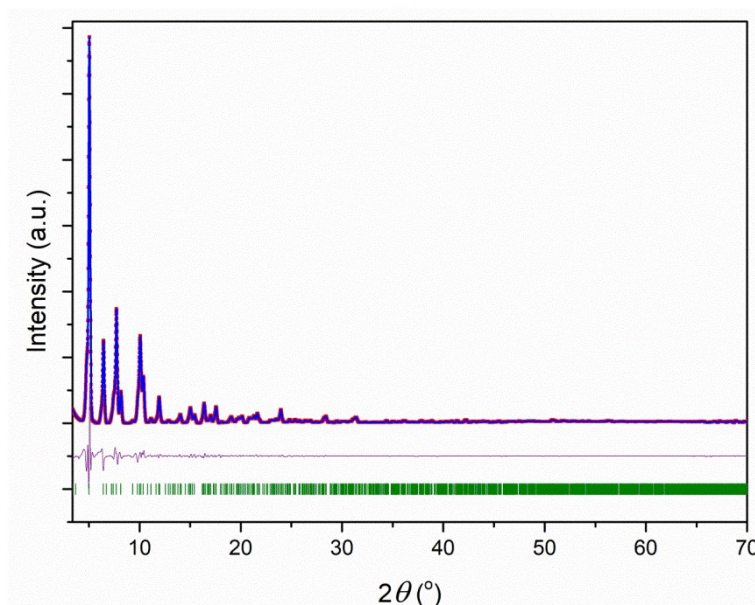

**Figure S38.** Le Bail refinement of  $\text{Cd}^{2+}@\mathbf{1}(\text{Y})$ .  $R_p = 9.89$ ,  $R_{wp} = 15.75$ . Red squares: observed pattern; blue line: calculated pattern; purple line: difference; green bars: observed reflections markers.

These parameters were used to replace the original cell dimensions of the pristine material, and after the reduction of the symmetry (space group was transformed from R-3 to P3), two ideal  $[\text{Cd}(\text{H}_2\text{O})_6]^{2+}$  octahedra with half occupancy (to balance the charge of the network) were placed in the cell at random positions. The transformations did not lead to significant modifications of the geometrical characteristics of the molecular structure of the anionic network. Simulated annealing with EXPO14 was used to solve the structure allowing only the  $[\text{Cd}(\text{H}_2\text{O})_6]^{2+}$  cations to move. The common characteristic of the derived solutions was the octahedral cation being positioned in close proximity to the etheric oxygen atoms of the  $\text{OBA}^{2-}$  ligand (Fig. S33).

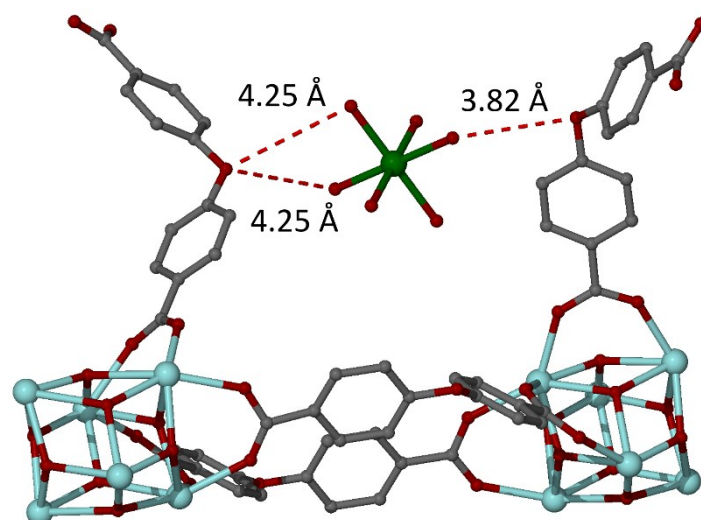

**Figure S39.** The location of  $[\text{Cd}(\text{H}_2\text{O})_6]^{2+}$  cations as derived by the simulated annealing structure solution with EXPO14. The second  $[\text{Cd}(\text{H}_2\text{O})_6]^{2+}$  possess a very similar position between a different pair of  $\text{OBA}^{2-}$  ligands.

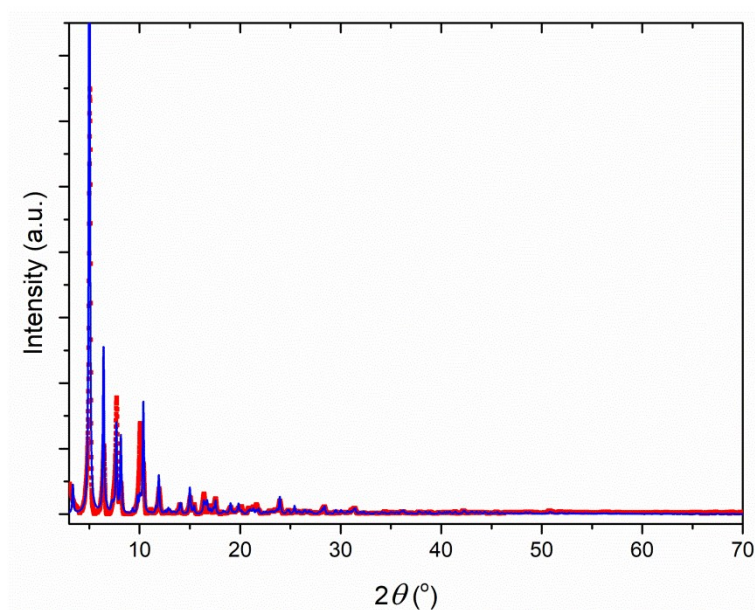

**Figure S40.** A comparison between the simulated powder XRD pattern from the structural model of the  $\text{Cd}^{2+}$  - exchanged material (blue line) with the experimental pattern (red squares).

The interaction of the cationic octahedron with the etheric oxygen can easily be realized when a second coordination sphere about the cation is considered. Although there is some crystallographic uncertainty concerning the obtained solution, we believe that the proposed model is realistic and chemically sound. There are several reasons to support this belief. a) The simulated X-ray pattern of the proposed structure is very similar to the experimental one (Fig.

S34). b) Very similar solutions were obtained when the symmetry of the initial model was increased changing the space group from P3 to P-3. c) The same procedure (i.e. collecting the powder X-ray patterns, processing, indexing, Le Bail refinement and solving the structure with simulated annealing) was applied for the  $\text{Mg}^{2+}$  - exchanged material leading to a similar structure solution involving a  $[\text{Mg}(\text{H}_2\text{O})_6]^{2+}$  octahedron in close proximity to the etheric oxygen atoms. (Figs. S35 – S37)

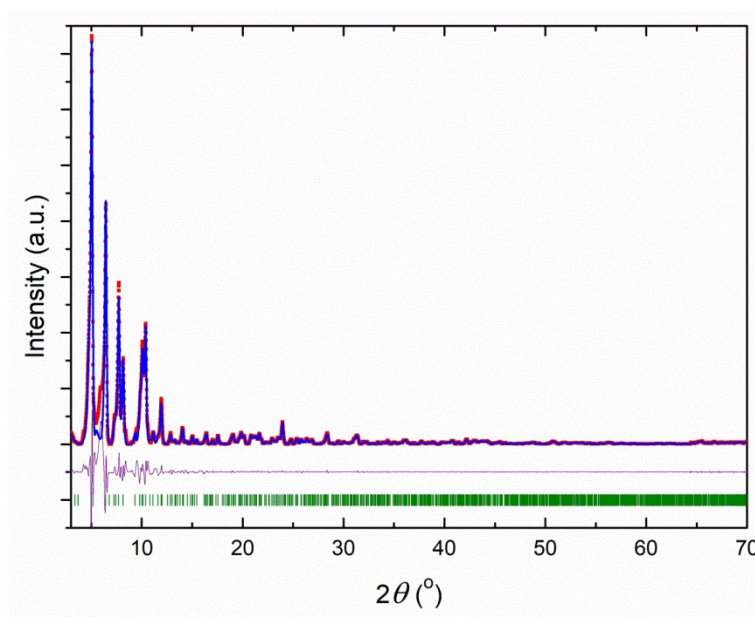

**Figure S41.** Le Bail refinement of the  $\text{Mg}^{2+}$  - exchanged material. Cell dimensions:  $a = b = 27.551 \text{ \AA}$ ,  $c = 26.147 \text{ \AA}$ ,  $\alpha = \beta = 90$  and  $\gamma = 120^\circ$ .  $R_p = 15.36$ ,  $R_{wp} = 25.60$ . Red squares: observed pattern; blue line: calculated pattern; purple line: difference; green bars: observed reflections markers.

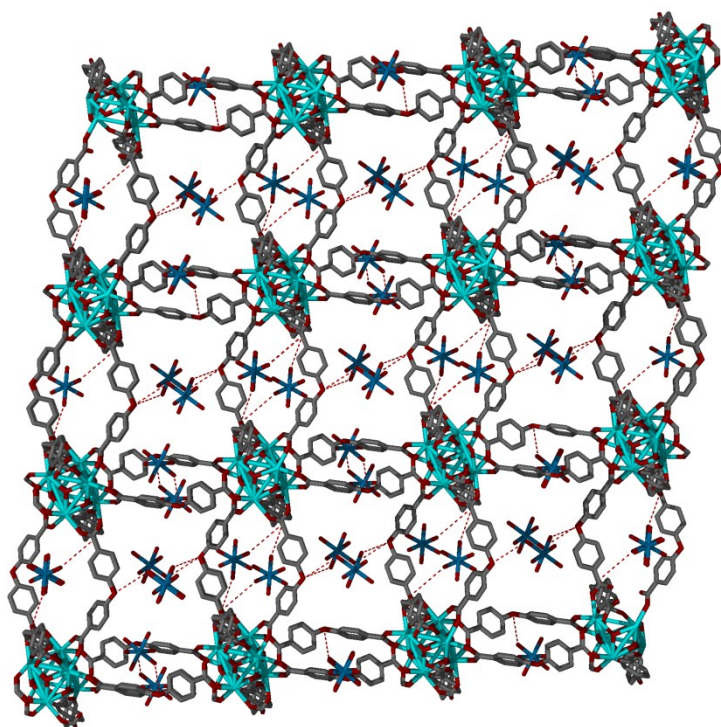

**Figure S42.** A packing diagram down to the (-1, -2, 1) cell dimension of the structural model produced for the  $\text{Mg}^{2+}$  - exchanged material with simulated annealing structure solution using EXPO14. Dashed red lines represent interactions similar to those presented in Fig. S33.

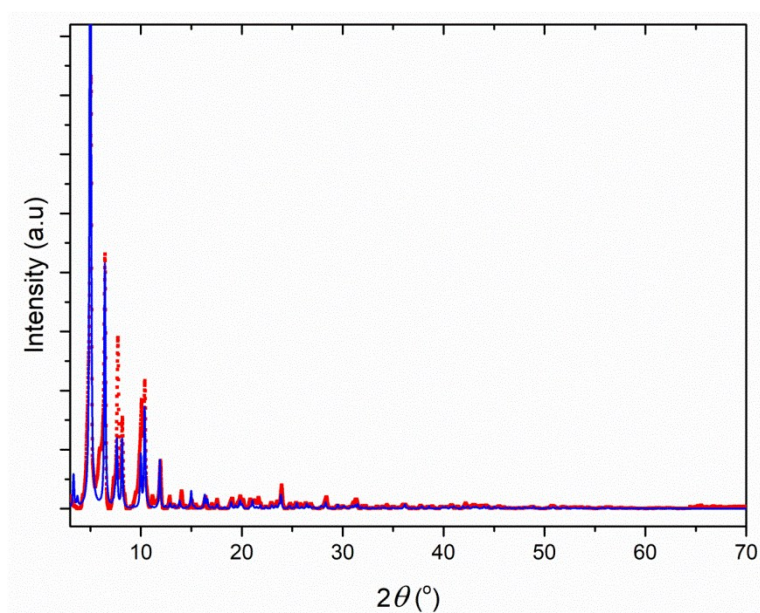

**Figure S43.** A comparison between the simulated powder XRD pattern from the structural model of the  $\text{Mg}^{2+}$  - exchanged material (blue line) with the experimental pattern (red squares).

## References

- 1 G. Sheldrick, *Acta Crystallogr. Sect. A*, 2008, **64**, 112–122.
- 2 E. OxfordDiffraction, CrysAlis CCD and CrysAlis RED, version p171.38.46; Oxford Diffraction Ltd, Abingdon, Oxford, *No Title*, 2017.
- 3 L. J. Farrugia, *J. Appl. Crystallogr.*, 1999, **32**, 837–838.
- 4 K. Brandenburg, *DIAMOND*, 2014, Version 3.2k, Crystal Impact GbR, Bonn, Germany.
- 5 A. Spek, *J. Appl. Crystallogr.*, 2003, **36**, 7–13.
- 6 L. Czepirski and J. JagiełŁo, *Chem. Eng. Sci.*, 1989, **44**, 797–801.
- 7 K. Sumida, D. L. Rogow, J. A. Mason, T. M. McDonald, E. D. Bloch, Z. R. Herm, T.-H. Bae and J. R. Long, *Chem. Rev.*, 2012, **112**, 724–781.
- 8 A. L. Myers and J. M. Prausnitz, *AIChE J.*, 1965, **11**, 121–127.
- 9 Y.-S. Bae, K. L. Mulfort, H. Frost, P. Ryan, S. Punathanam, L. J. Broadbelt, J. T. Hupp and R. Q. Snurr, *Langmuir*, 2008, **24**, 8592–8598.
- 10 G. S. Armatas and M. G. Kanatzidis, *Nat. Mater.*, 2009, **8**, 217.
- 11 WinPLOTR: a Windows tool for powder diffraction patterns analysis. T. Roisnel, J. Rodriguez-Carvajal, in Materials Science Forum, Proceedings of the Seventh European Powder Diffraction Conference (EPDIC 7), 2000, p.118-123, Ed. R. Delhez and E.J. Mittenmeijer.
- 12 A. Altomare, C. Cuocci, C. Giacovazzo, A. Moliterni, R. Rizzi, N. Corriero and A. Falcicchio, *J. Appl. Crystallogr.*, 2013, **46**, 1231–1235.
- 13 A. Altomare, G. Campi, C. Cuocci, L. Eriksson, C. Giacovazzo, A. Moliterni, R. Rizzi and P.-E. Werner, *J. Appl. Crystallogr.*, 2009, **42**, 768–775.
